# Supplementary material for: Pd(ii)/diphosphine/curcumin complexes as potential anticancer agents
Source: Royal Society of Chemistry journal article supplement (doi:10.1039/d4dt01045k), 2024-01-01
Supplement: d4dt01045k1.pdf [file d4dt01045k1.pdf]

## SUPPORTING INFORMATION

### **Pd(II)/diphosphine/curcumin complexes as potential anticancer agents**

Jocely L. Dutra,<sup>\*a,b</sup> João Honorato,<sup>c</sup> Angélica Graminha,<sup>a</sup> Carlos André F. Moraes,<sup>a</sup> Kleber T. de Oliveira,<sup>a</sup> Marcia R. Cominetti,<sup>d</sup> Eduardo E. Castellano<sup>e</sup> and Alzir A. Batista<sup>\*a</sup>

- a. Departamento de Química, Universidade Federal de São Carlos – UFSCar, CP 676, CEP 13561-901, São Carlos, SP, Brazil. E-mail: [jocely.dut@hotmail.com](mailto:jocely.dut@hotmail.com); [daab@ufscar.br](mailto:daab@ufscar.br)
- b. Departamento de Química, Universidade Federal do Amazonas – UFAM, CEP 69077-000, Itacoatiara, AM, Brazil
- c. Instituto de Química, Universidade de São Paulo – USP, CEP 05508-900, São Paulo, SP, Brazil.
- d. Departamento de Gerontologia, Universidade Federal de São Carlos – UFSCar, CP 676, 13561-901, São Carlos, SP, Brazil.
- e. Instituto de Física de São Carlos, Universidade de São Paulo – USP, CP 369, CEP 13560-970, São Carlos, SP, Brazil.

## Characterization of complexes

### Figures

Figure S1: ESI(+)-MS/MS analysis of the complexes A1-A5.

Figures S2-S7: FTIR spectra for the curcumin and the complexes A1-A5.

Figure S8. UV-vis spectra of the complexes A1-A5 in DMSO.

Figure S9. UV-vis spectrum of complex A1 deconvoluted in Matlab.

Figures S10-S15:  $^{31}\text{P}\{^1\text{H}\}$ ,  $^1\text{H}$ ,  $^{13}\text{C}\{^1\text{H}\}$ , COSY, HSQC, and HMBC NMR spectra of complexes (A1-A5), in acetone- $d_6$  at 298 K.

Figure S16.  $^{31}\text{P}\{^1\text{H}\}$  NMR spectra of the complexes (A) **A1**; (B) **A2**; (C) **A3**; (D) **A4** and (E) **A5**, in DMSO (with  $\text{D}_2\text{O}$  capillary), in 0, 24, and 48 h.

Figure S17. UV-vis spectra in RPMI Culture medium (DMSO 0.5%) of the complexes (A) **A1**; (B) **A2**; (C) **A3**; (D) **A4**; (E) **A5** (40  $\mu\text{M}$ ) and (F) curcumin (20  $\mu\text{M}$ ) at different times.

Figure S18. Cytotoxicity of complexes. Concentration-response curve of tumor cells (MDA-MB-231, MCF7, SKBR-3, A549, DU-145, A2780 and A2780cis) and non-tumor cells (MCF-10A and MRC-5) after complexes treatment for 48 h.

Figure S19. Effect of complex A1 on A2780cis cell morphology after incubation for 0, 24, and 48 h.

Figure S20. Effect of complex A1 on MRC-5 cell morphology after incubation for 0, 24, and 48 h.

Figure S21. Effect of complex A1 on A2780cis cell migration by using an inverted microscope (4 $\times$ ) and graph of the wound-healing closure percentages for treatment with complex A1. These experiments were representative of three independent assays. Significance at (\*\*\*\*)  $p < 0.0001$  using ANOVA. Solvent control experiments were performed with DMSO (0.5%).

Figure S22.  $^1\text{H}$  NMR spectra of the A1 complex with guanosine (1 mol: 2 mol) at 0, 24 and 48 hours in deuterated DMSO.

Figure S23. Emission spectra of Hoechst (2.5  $\mu\text{M}$ )/CT-DNA (75  $\mu\text{M}$ ) ( $\lambda_{\text{ex}} = 343 \text{ nm}$ ) with different concentrations of complexes A2-A5 (a = 0; b = 2.5  $\mu\text{M}$ ; c = 5.0  $\mu\text{M}$ ; d = 7.5  $\mu\text{M}$ ; e = 10.0  $\mu\text{M}$ ; f = 12.5  $\mu\text{M}$ ; g = 15.0  $\mu\text{M}$ ; h = 17.5  $\mu\text{M}$ ; i = 20.0  $\mu\text{M}$ ).

Figure S24. Fluorescence spectra of HSA solution (2.5  $\mu\text{M}$ ) in Tris-HCl buffer (0.1 M NaCl, pH 7.4) in the absence and presence of different concentrations of complexes A1-A5 (a = 0; b = 2.5  $\mu\text{M}$ ; c = 5.0  $\mu\text{M}$ ; d = 7.5  $\mu\text{M}$ ; e = 10.0  $\mu\text{M}$ ; f = 12.5  $\mu\text{M}$ ; g = 15.0  $\mu\text{M}$  and h = 17.5  $\mu\text{M}$ ). Inset: Stern-Volmer plots for the quenching of HSA fluorescence by complexes, 298, 303 and 310 K.

### Tables

Table S1. Selected Interatomic Distances and Bond Angles for complexes.

Table S2. Crystal data and structure refinement parameters obtained for the complexes **A1**, **A2**, **A4** and **A5**.

Table S3. Assign the main IR bands of free curcumin and complexes.

Table S4. In vitro cell viability results ( $\text{IC}_{50}$  values) toward some cell lines studied.

Table S5. In vitro cell viability results ( $\text{IC}_{50}$  values) toward some cell lines studied.

## Complexes structure

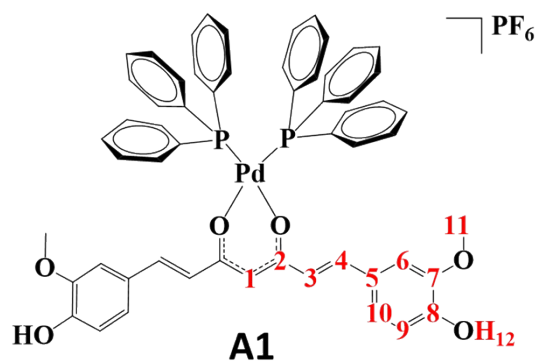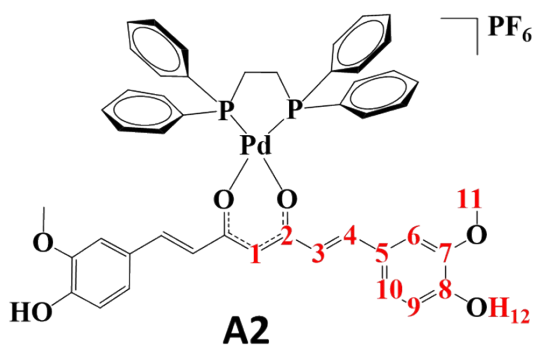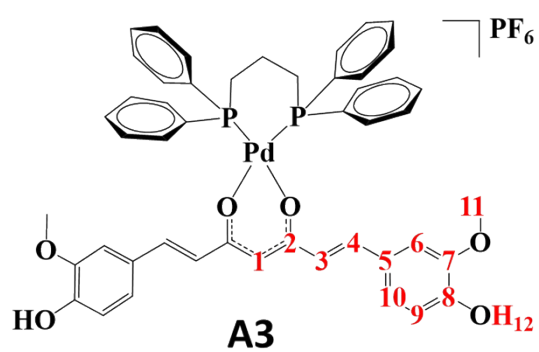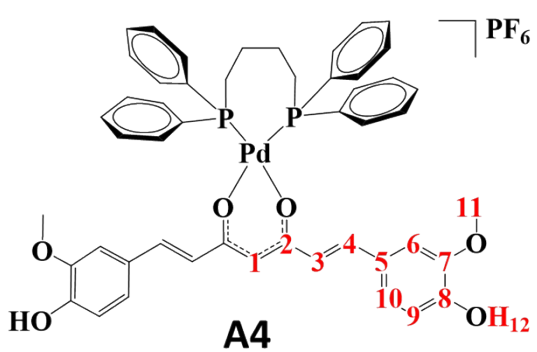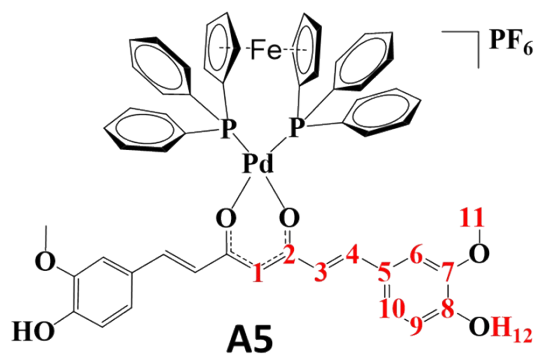

## Figures

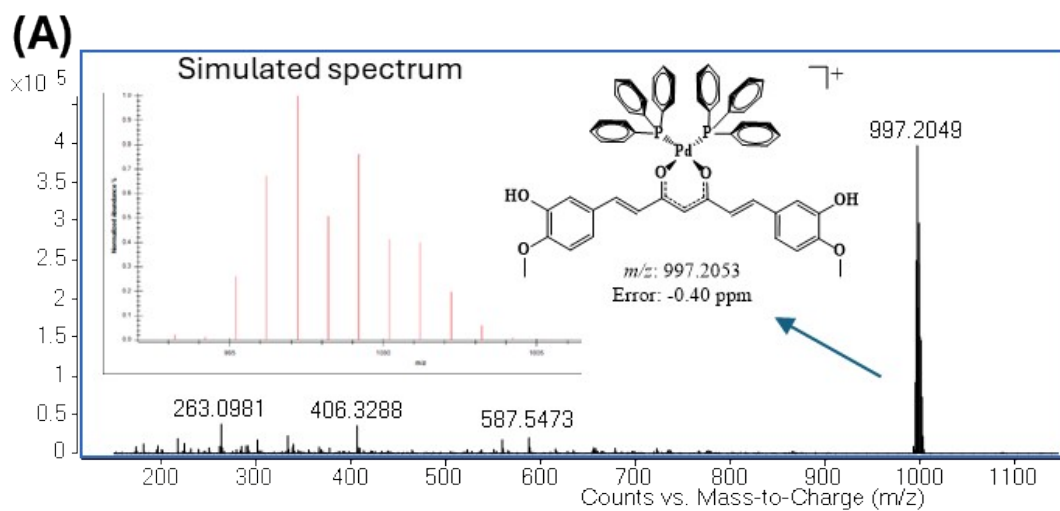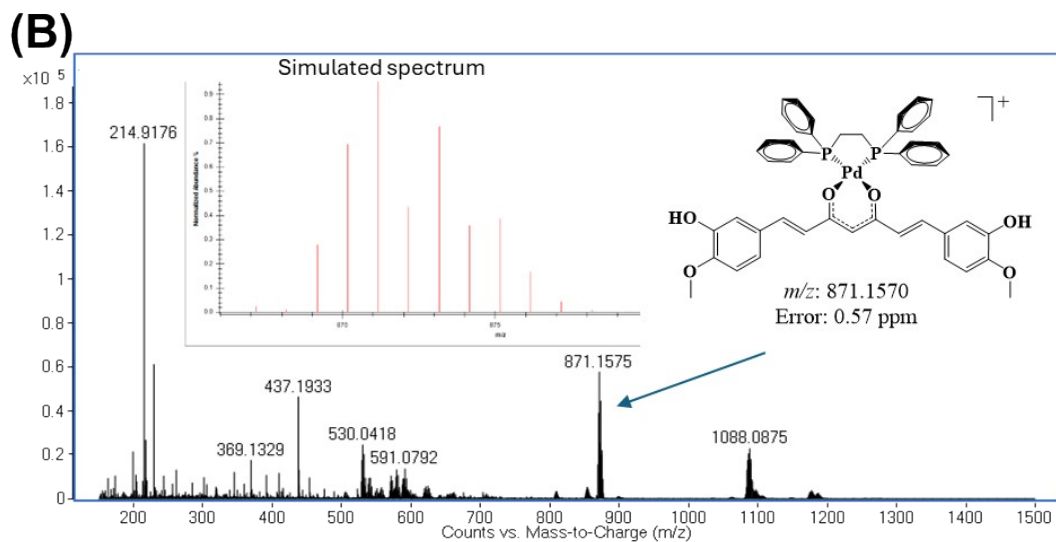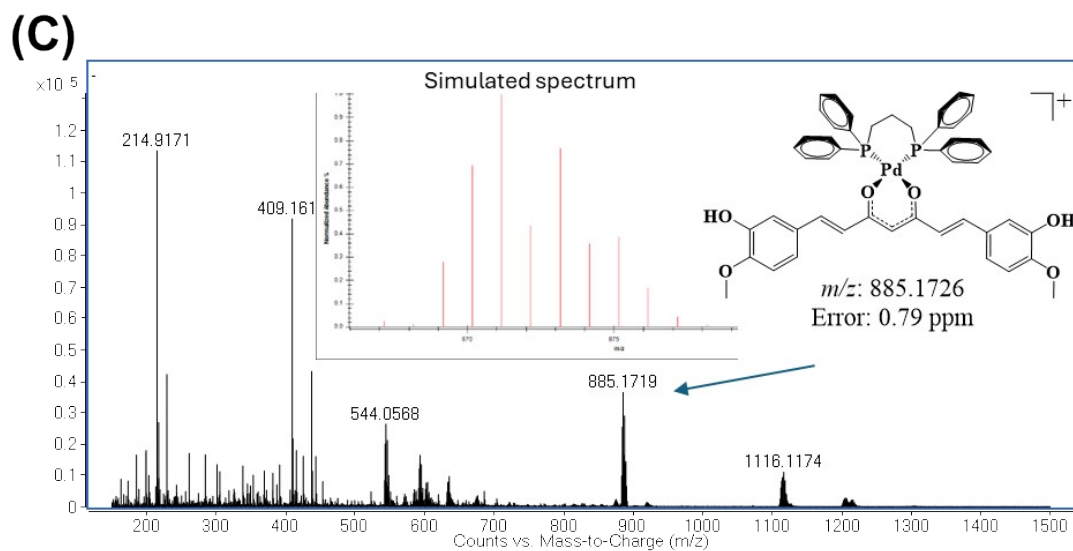

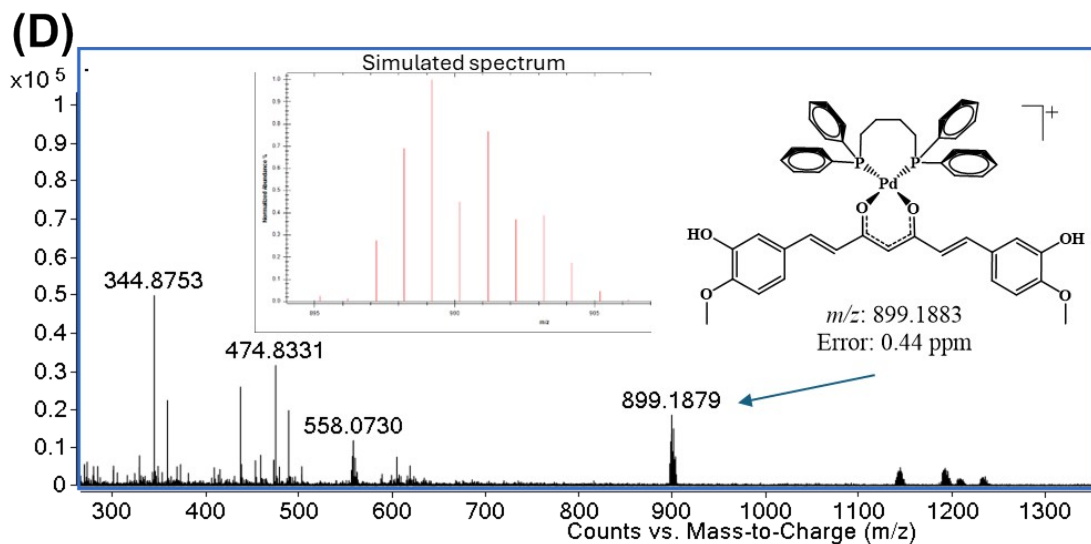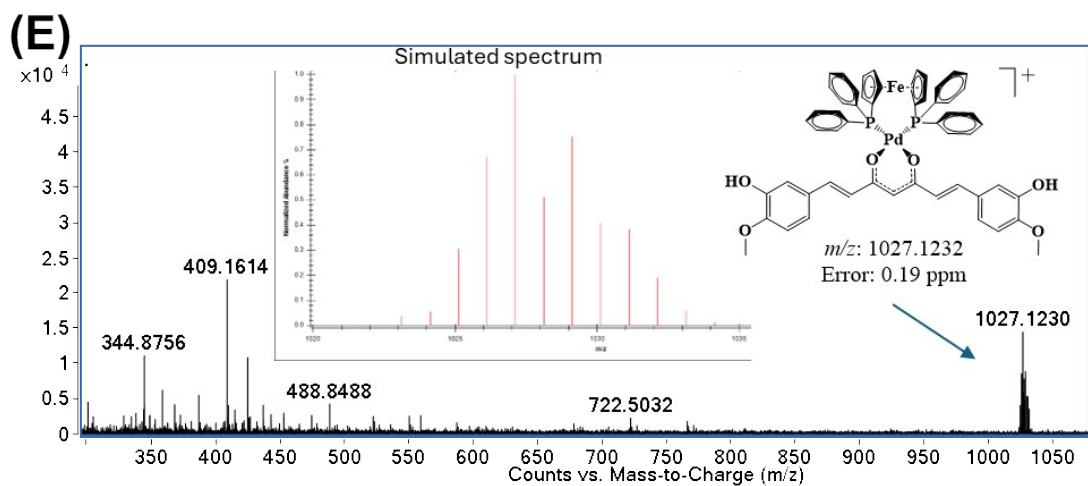

Figure S1. ESI(+)-MS/MS analysis of the complexes (A) A1, (B) A2, (C) A3, (D) A4 e (E) A5. Comparison between theoretical and experimental mass isotope distribution corresponding to the  $[M]^+$ .

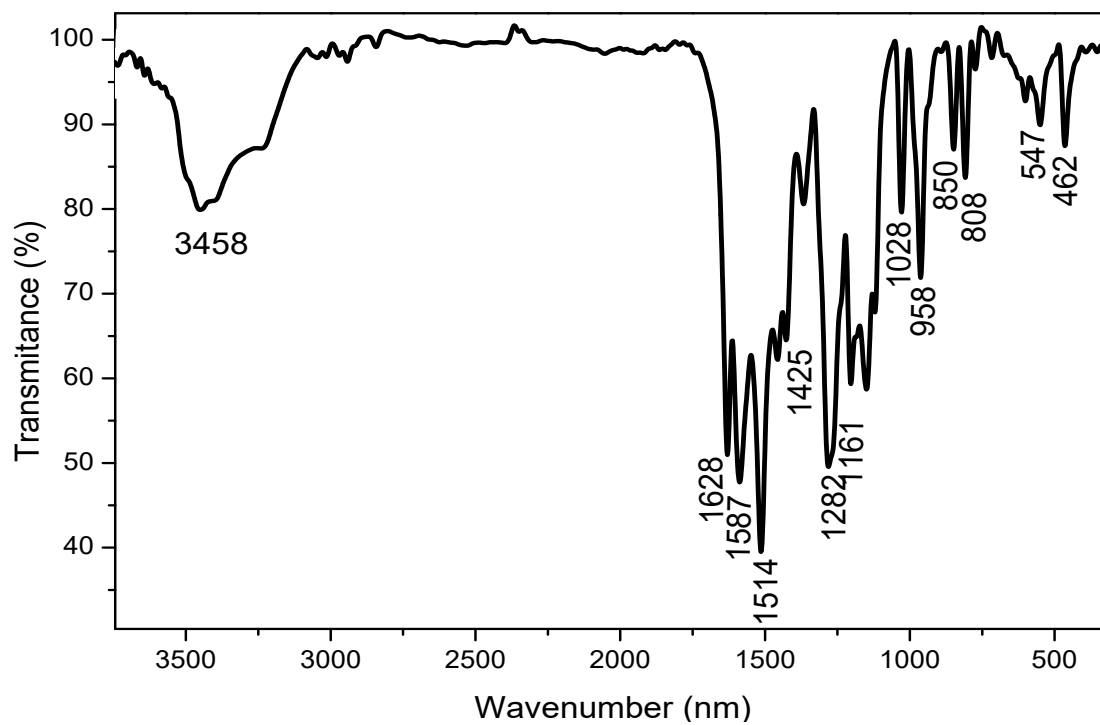

Figure S2. FTIR spectra for the curcumin.

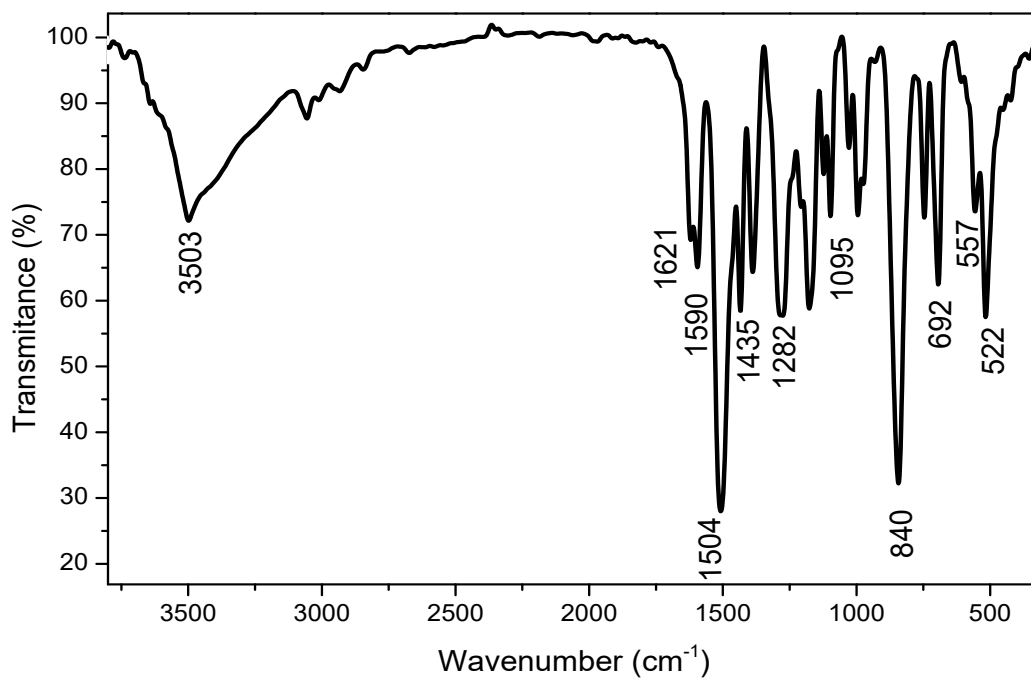

Figure S3. FTIR spectra for complex A1.

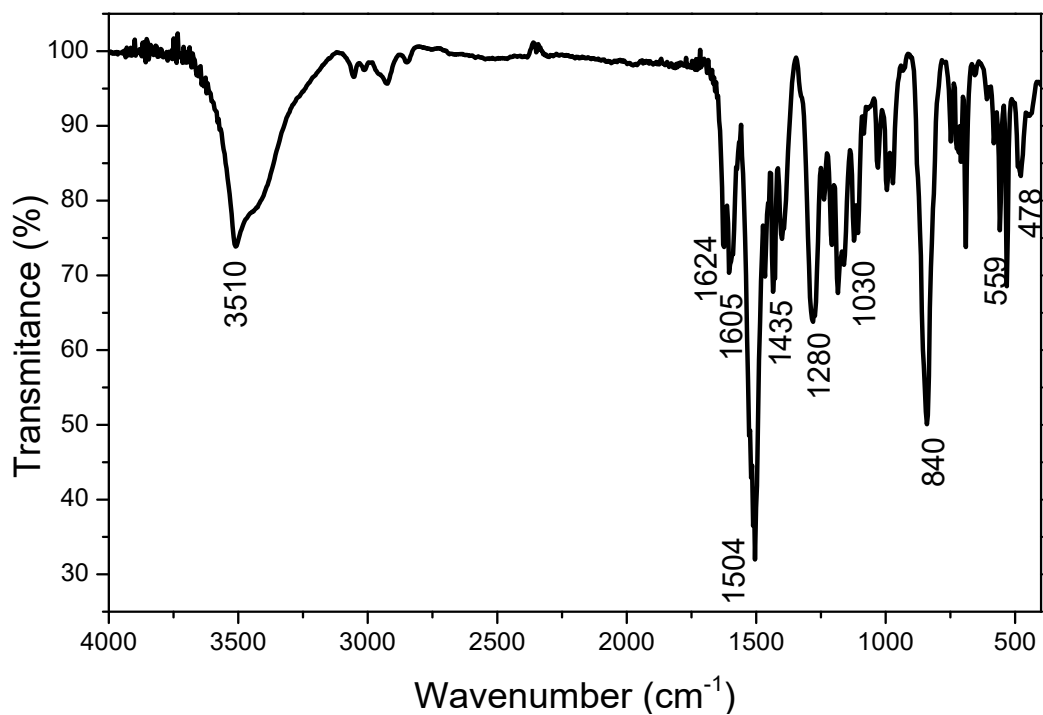

Figure S4. FTIR spectra for complex **A2**.

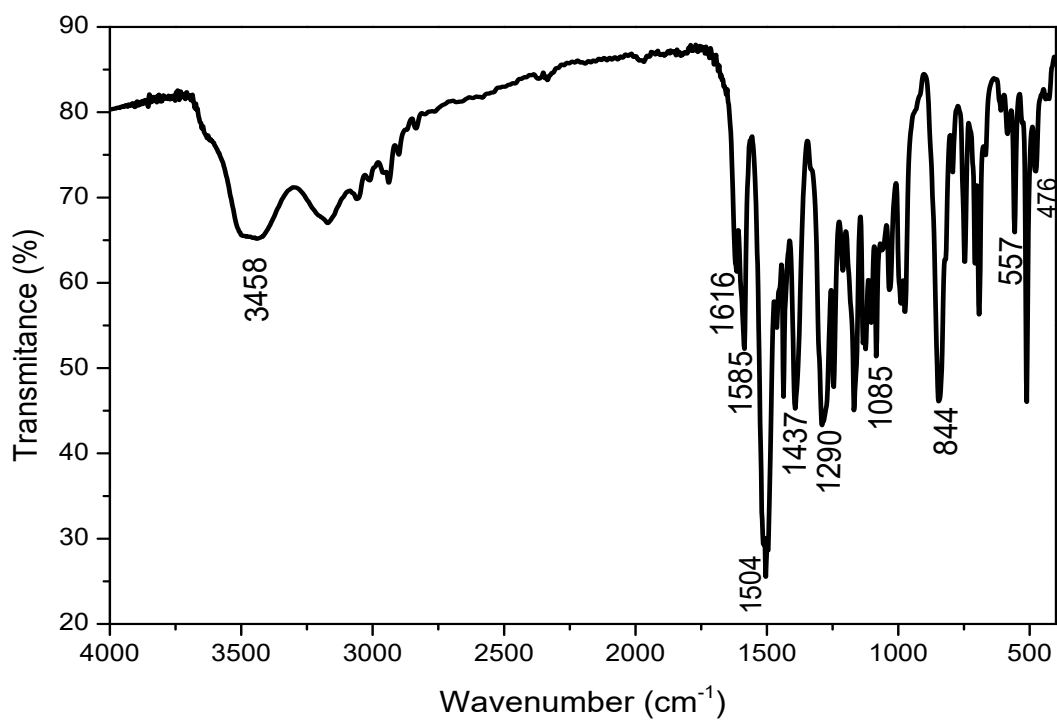

Figure S5. FTIR spectra for complex **A3**.

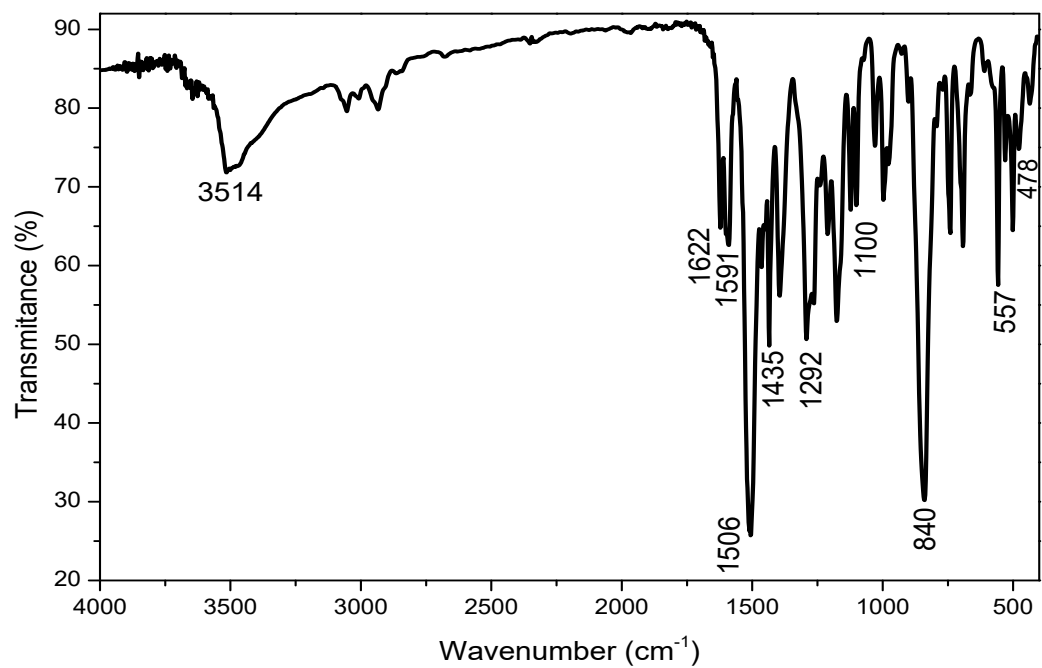

Figure S6. FTIR spectra for complex A4.

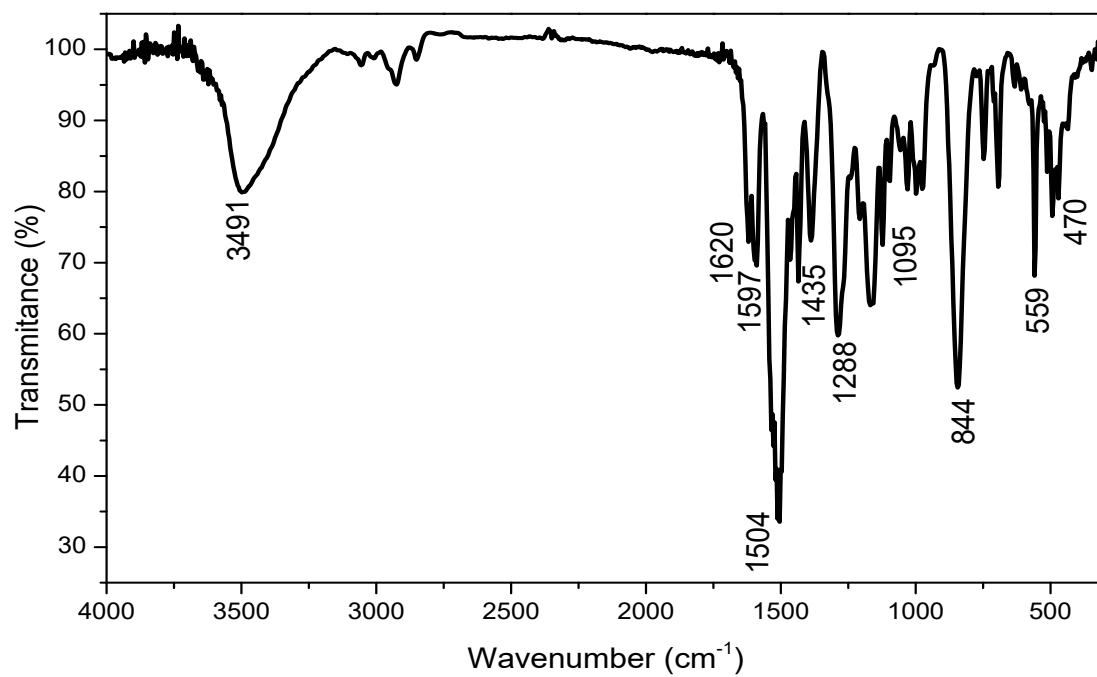

Figure S7. FTIR spectra for complex A5.



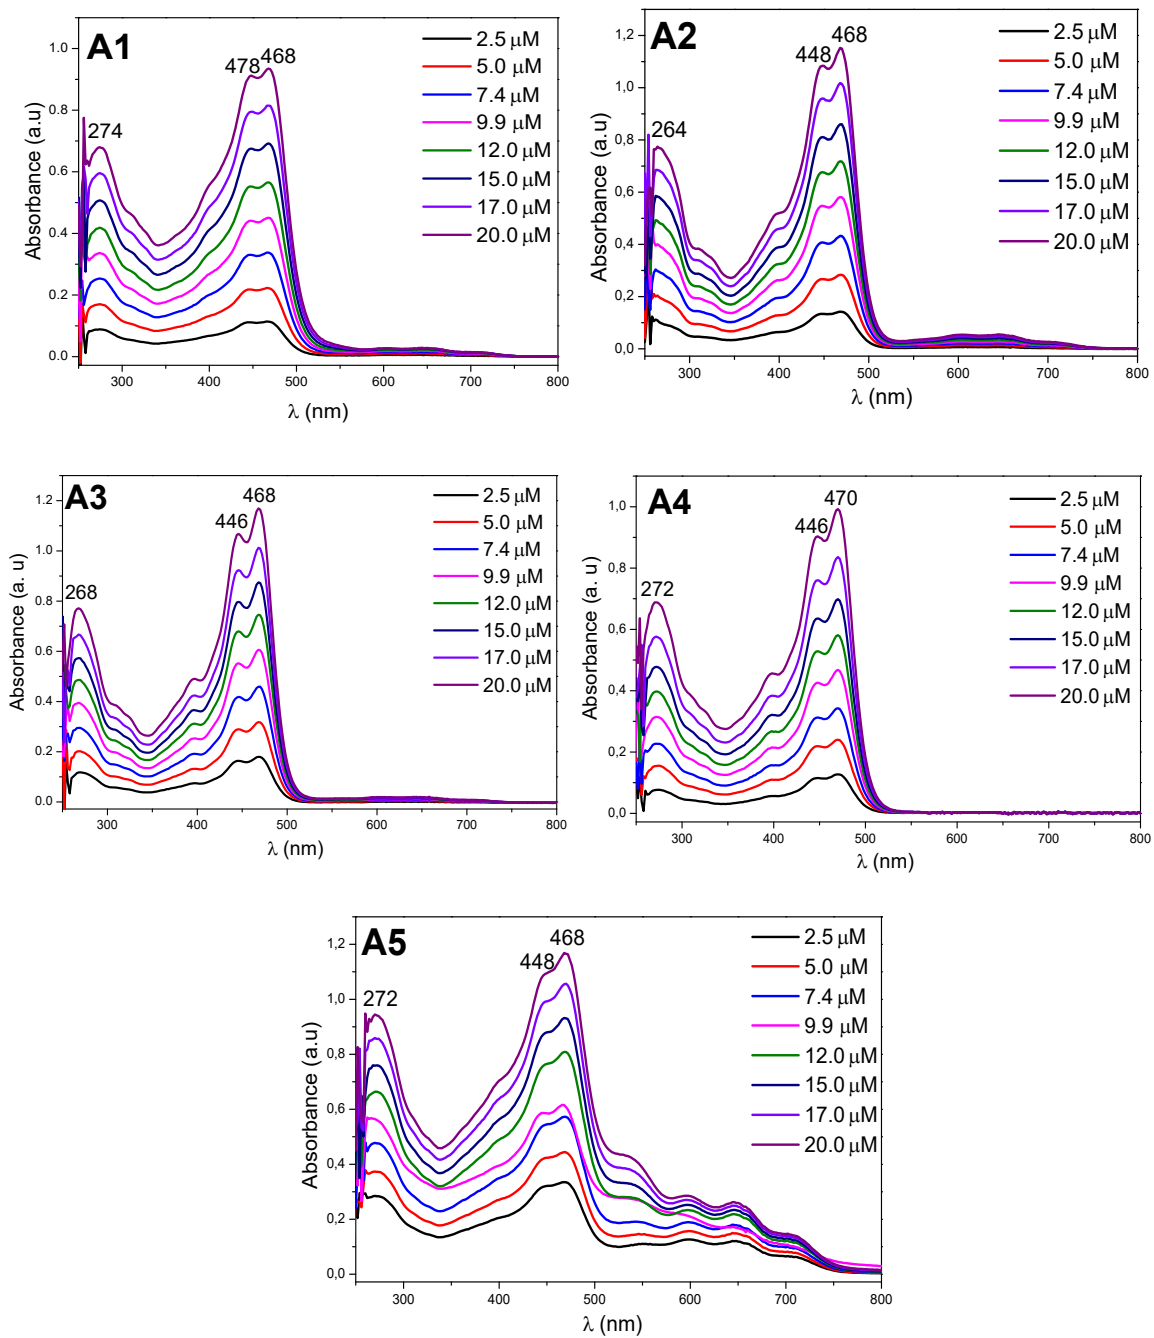

Figure S8. UV-vis spectra of the complexes A1-A5 in DMSO.

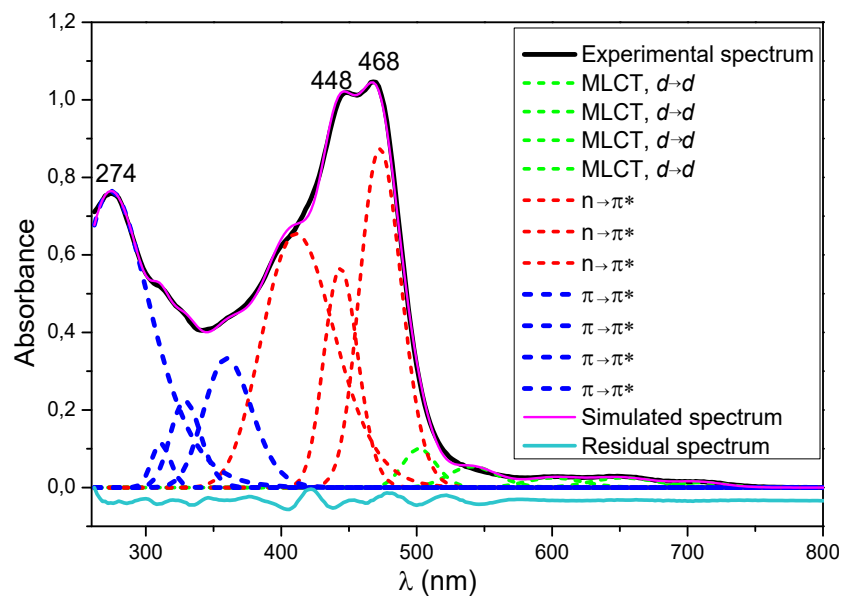

Figure S9. UV-vis spectrum of complex A1 deconvoluted in Matlab.

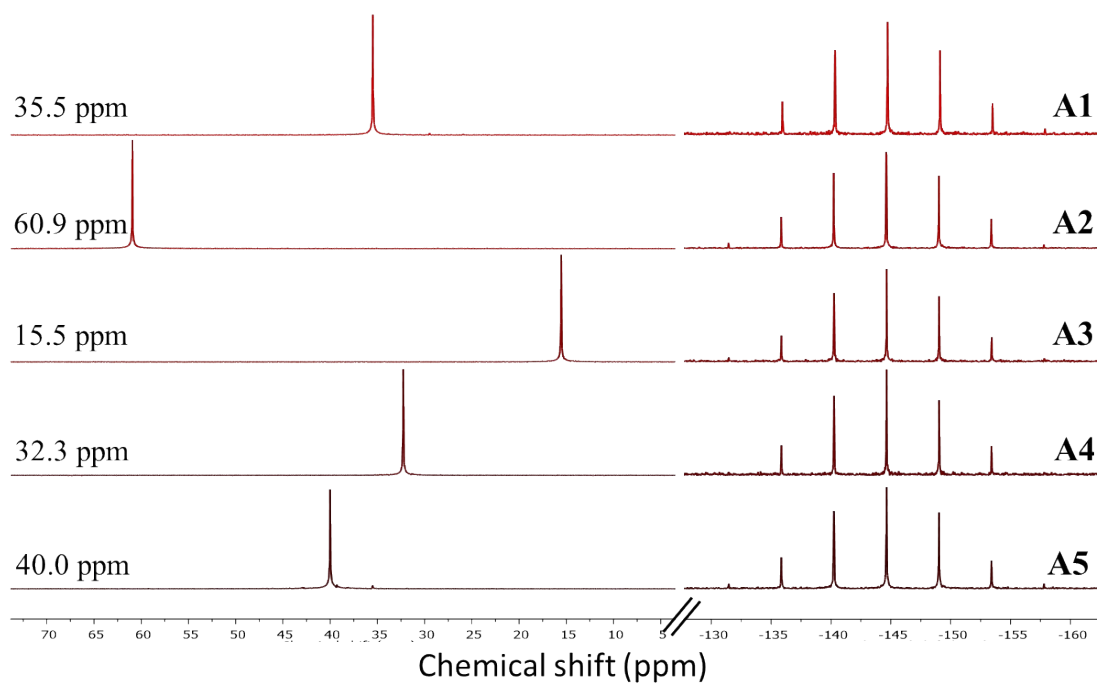

Figure S10.  $^{31}\text{P}\{^1\text{H}\}$  NMR spectra of complexes A1–A5, in  $\text{CH}_2\text{Cl}_2$  (with  $\text{D}_2\text{O}$  capillary).

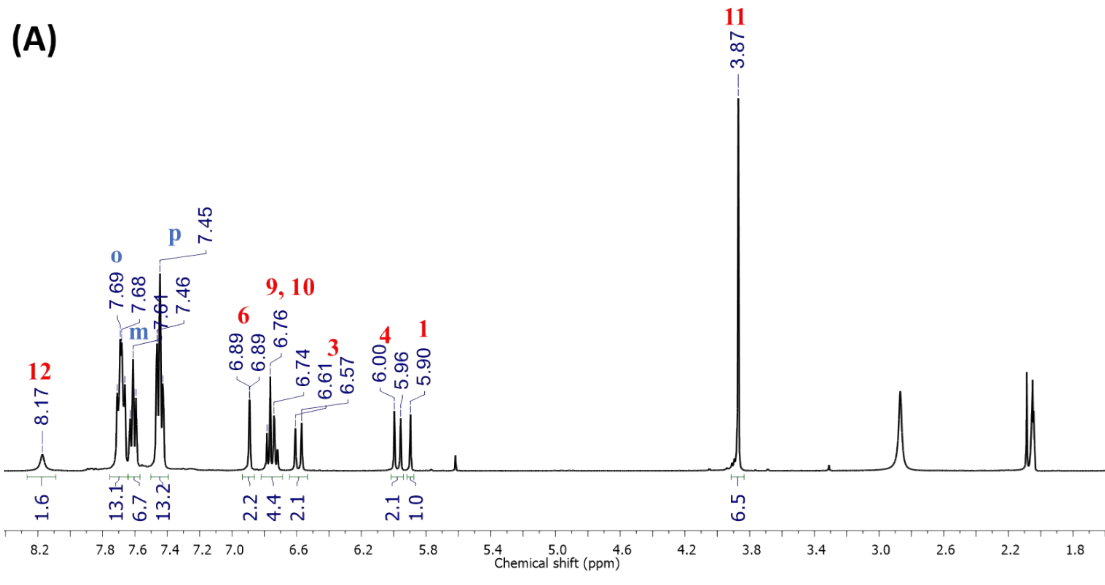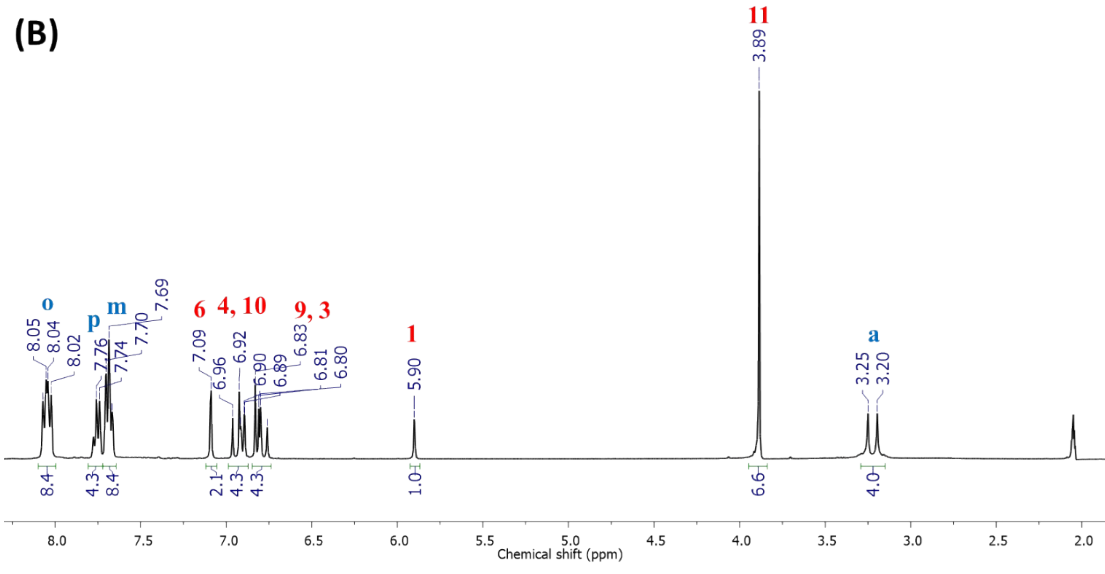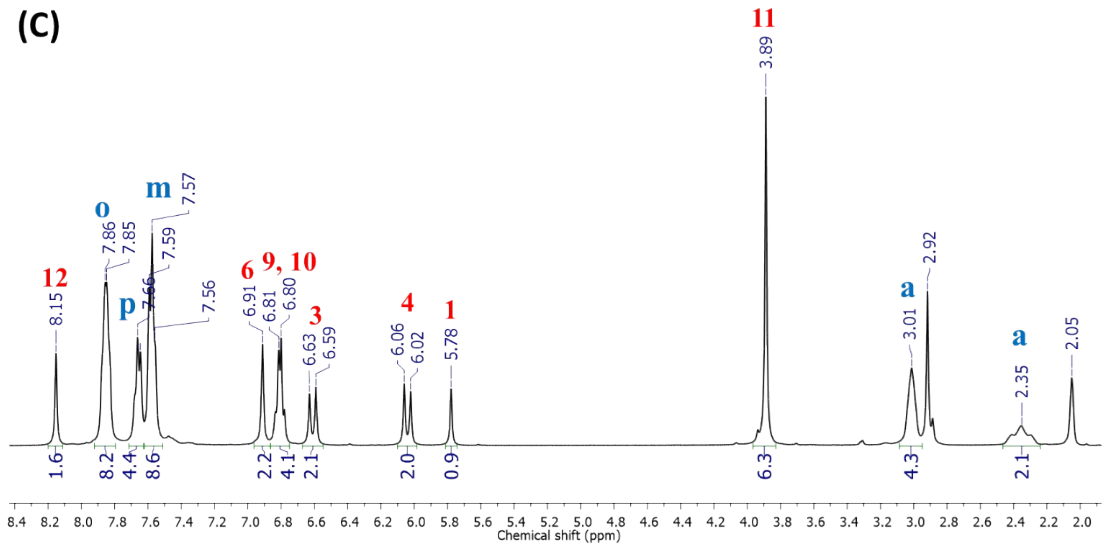

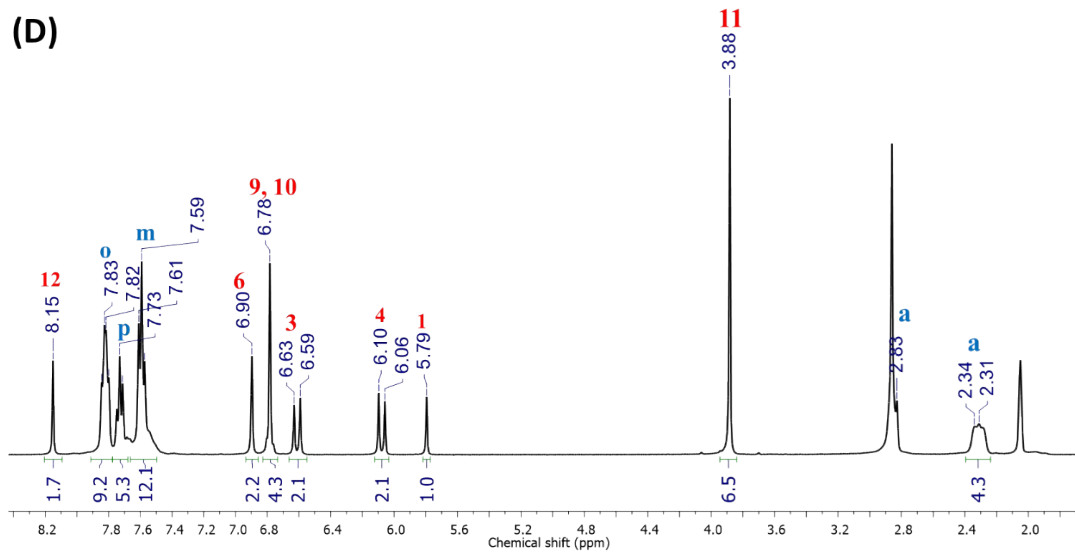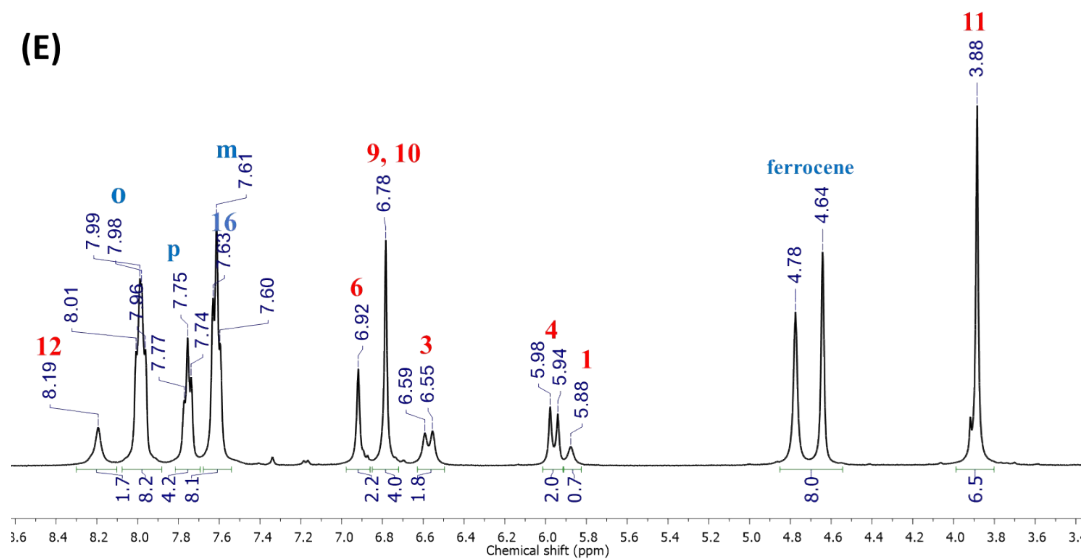

Figure S11. NMR  $^1\text{H}$  spectra of the complexes (A) A1; (B) A2; (C) A3; (D) A4 e (E) A5, in acetone- $\text{d}_6$ .

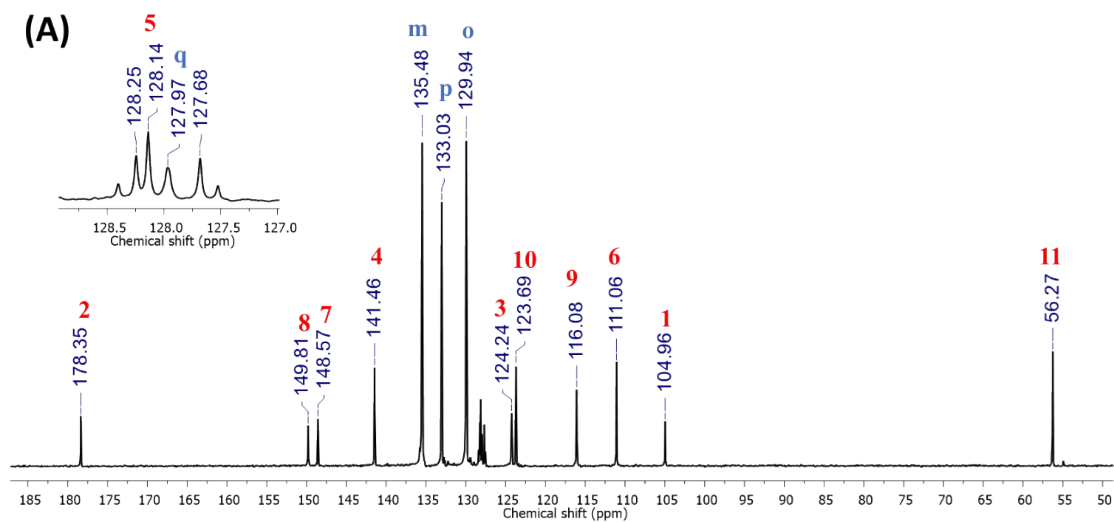

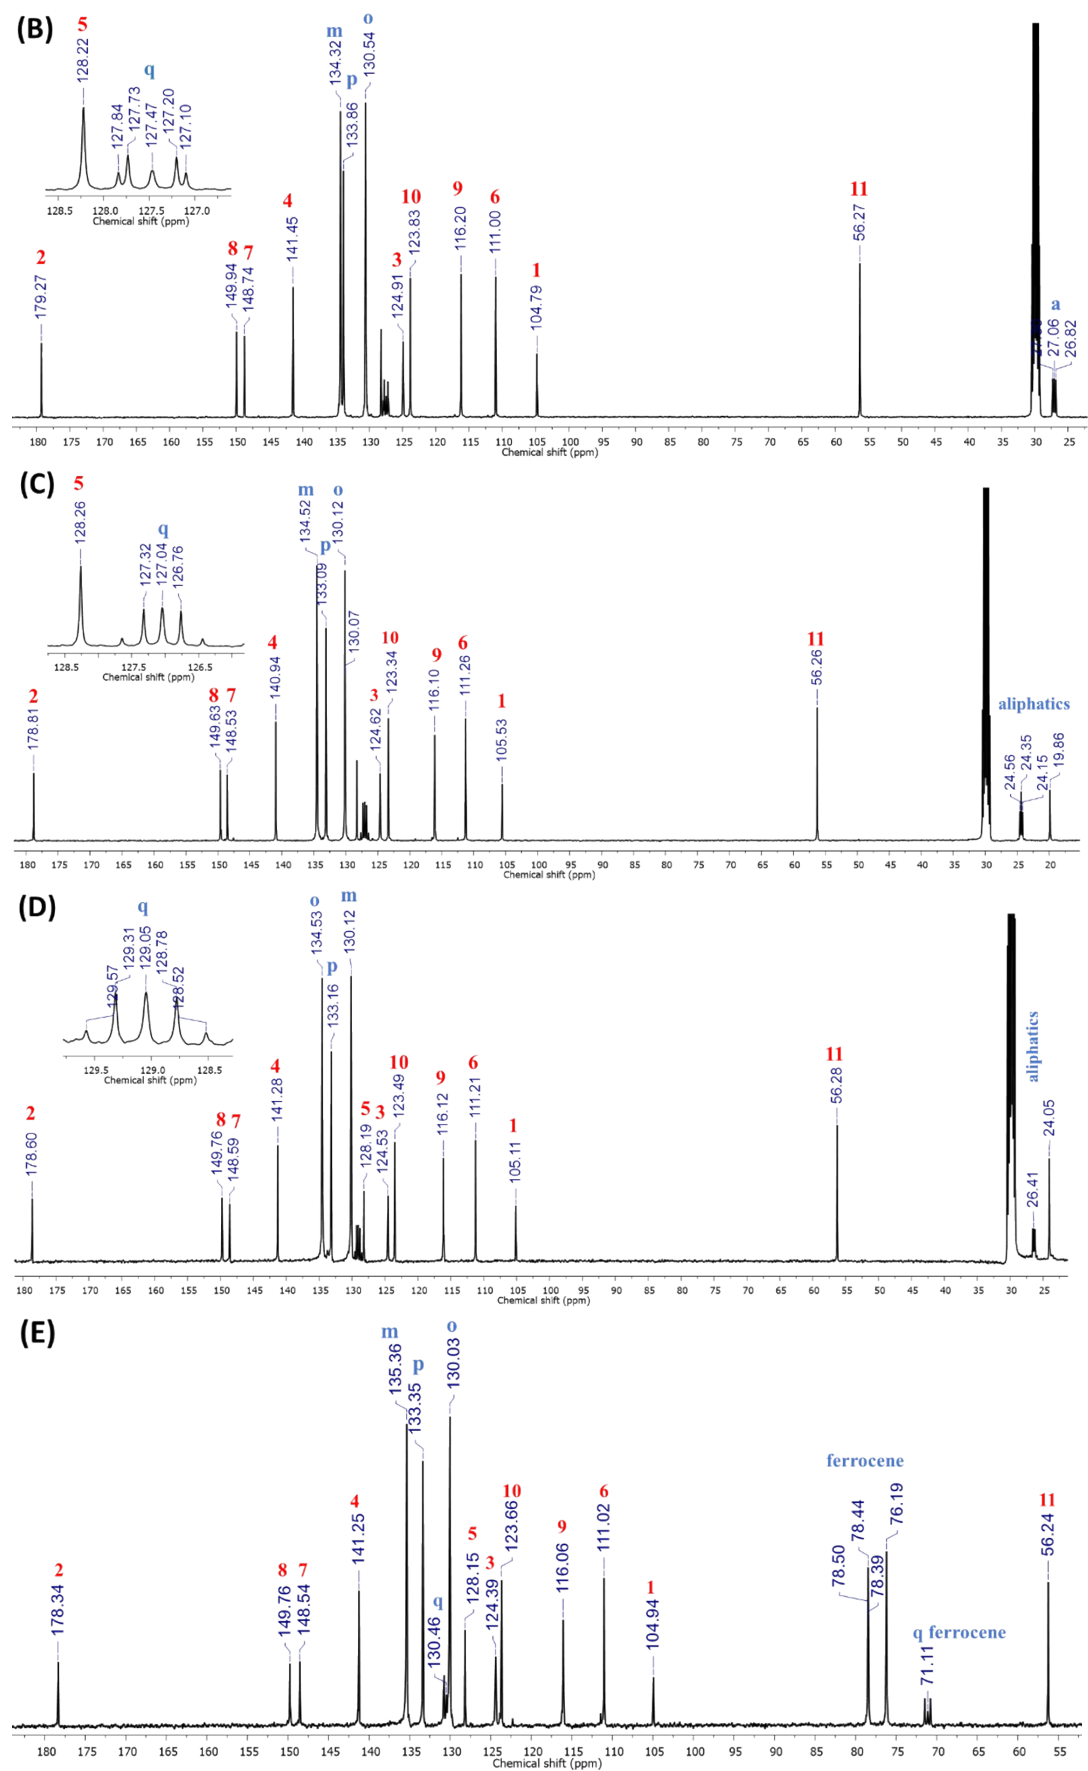

Figure S12. NMR  $^{13}\text{C}$  spectra of complexes (A) **A1**; (B) **A2**; (C) **A3**; (D) **A4** and (E) **A5**, in acetone- $\text{d}_6$ .

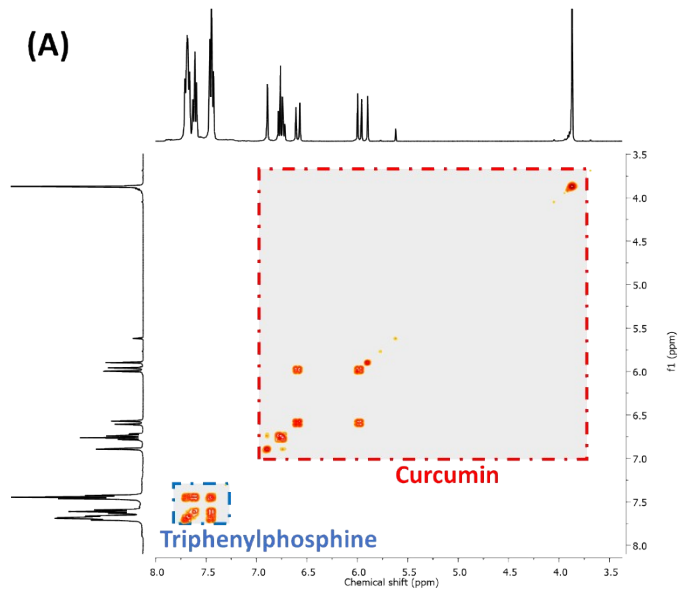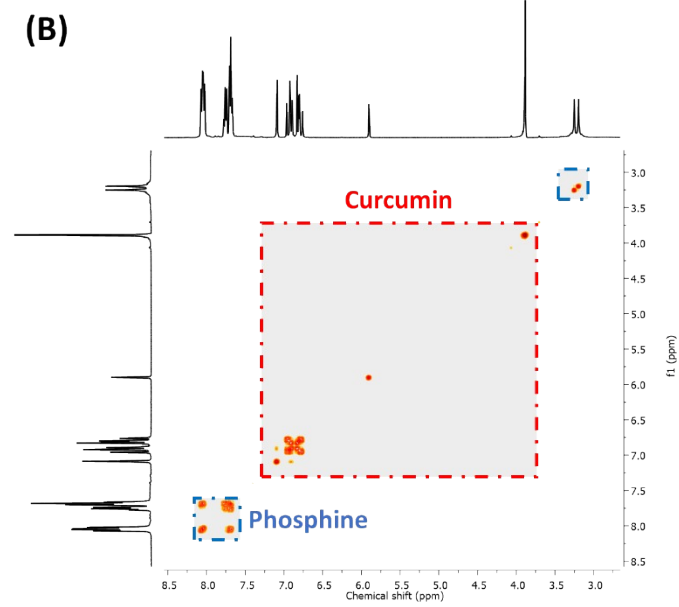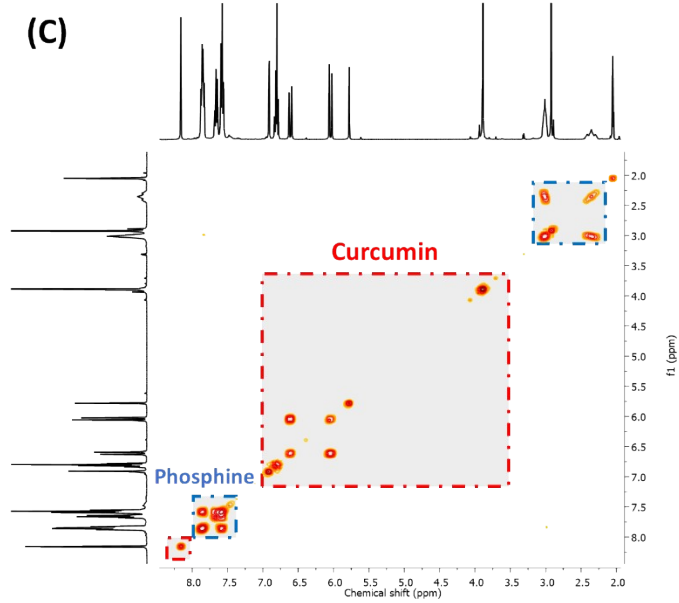

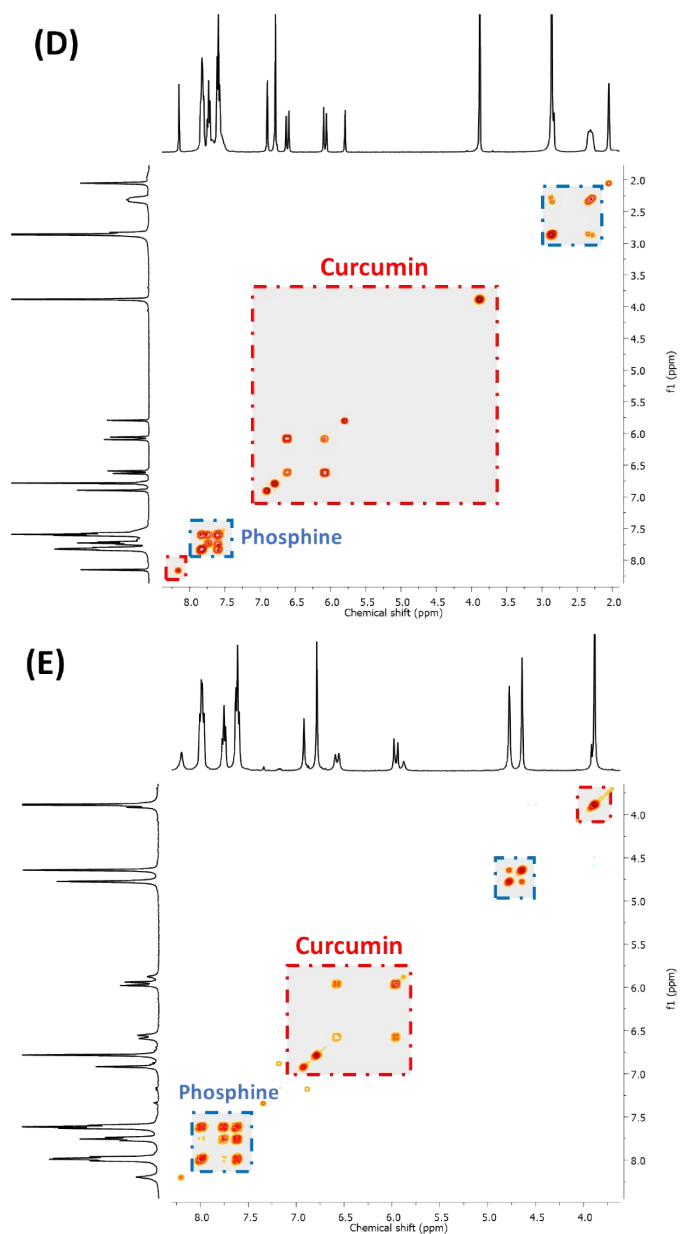

Figure S13. COSY  $^1\text{H}$ - $^1\text{H}$  NMR spectra of complexes (A) **A1**; (B) **A2**; (C) **A3**; (D) **A4** and (E) **A5**, in acetone- $\text{d}_6$ .

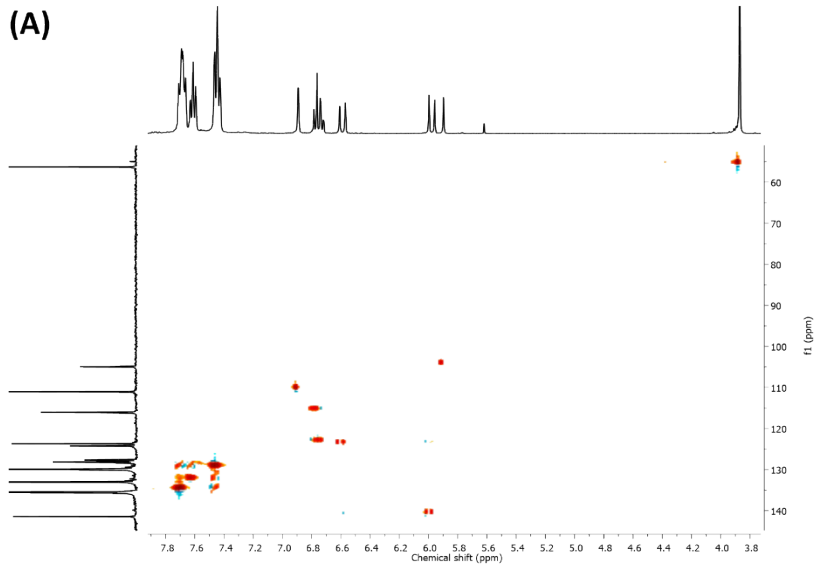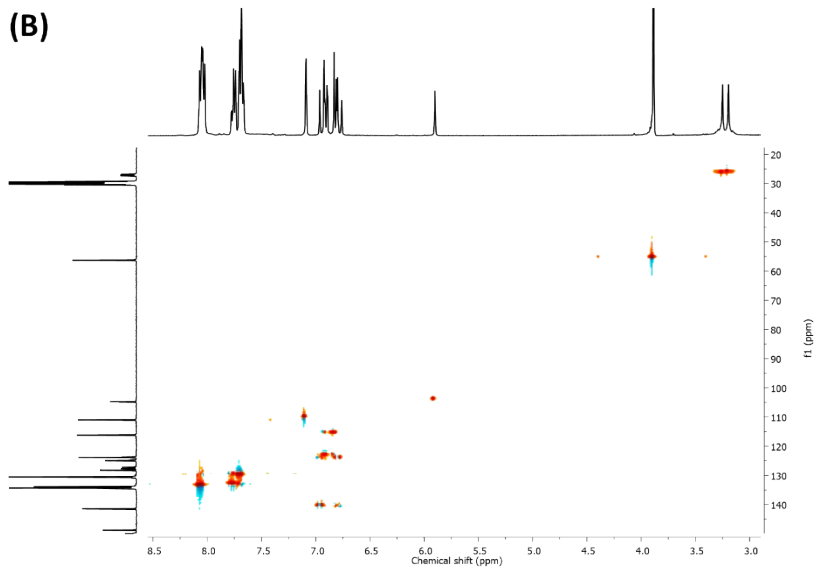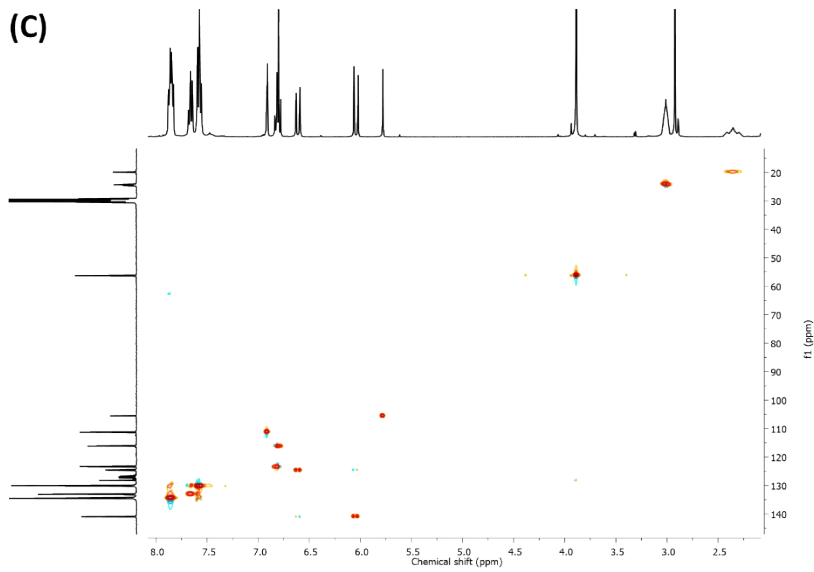



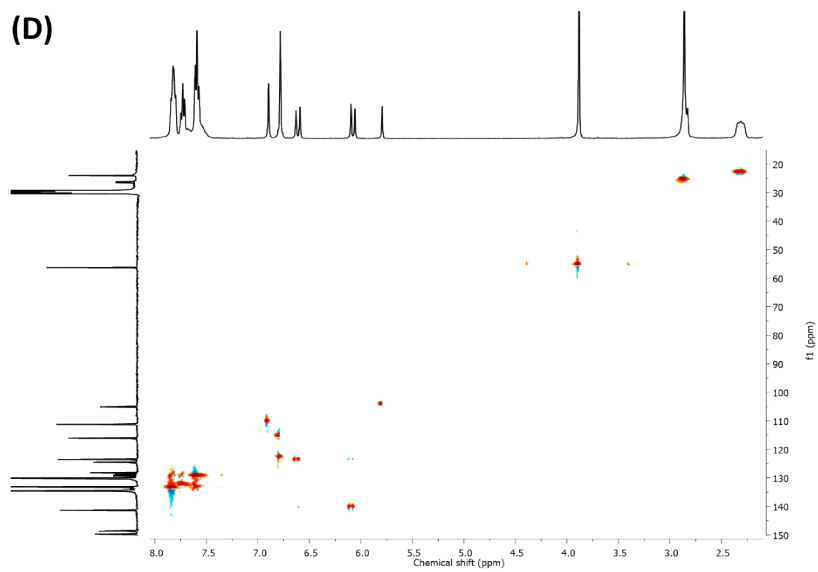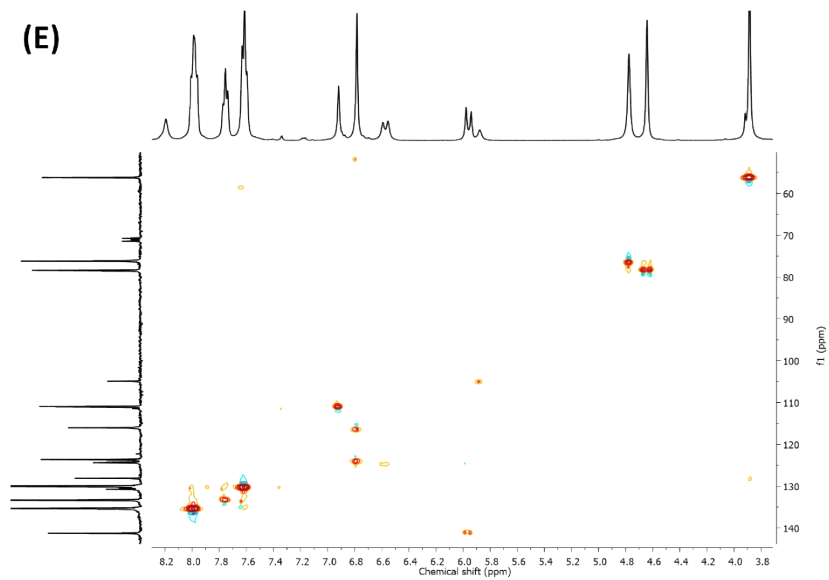

Figure S14.  $^1\text{H}$ - $^{13}\text{C}$  HSQC NMR of complexes (A) **A1**; (B) **A2**; (C) **A3**; (D) **A4** and (E) **A5**, in acetone- $\text{d}_6$ .

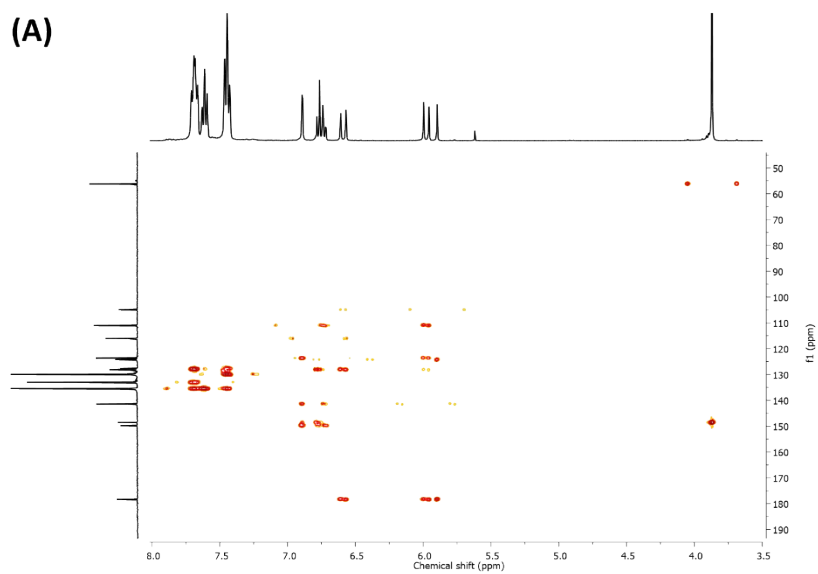

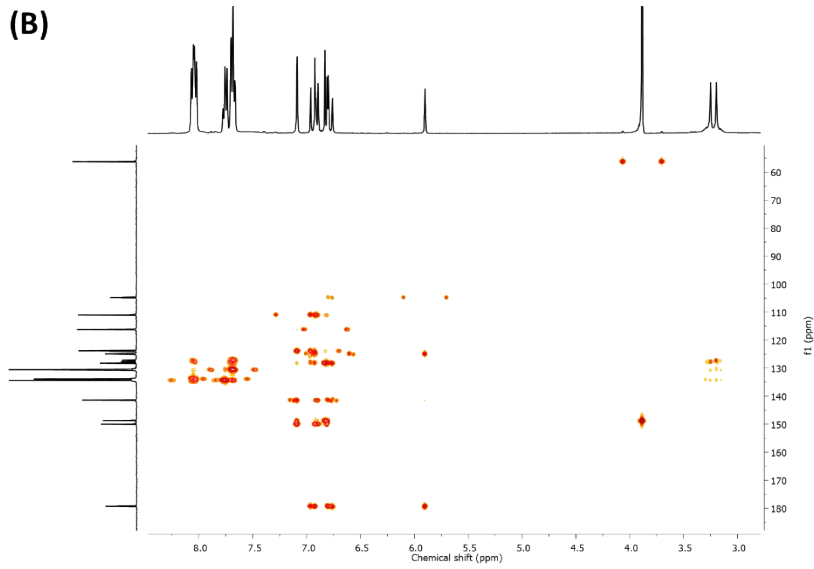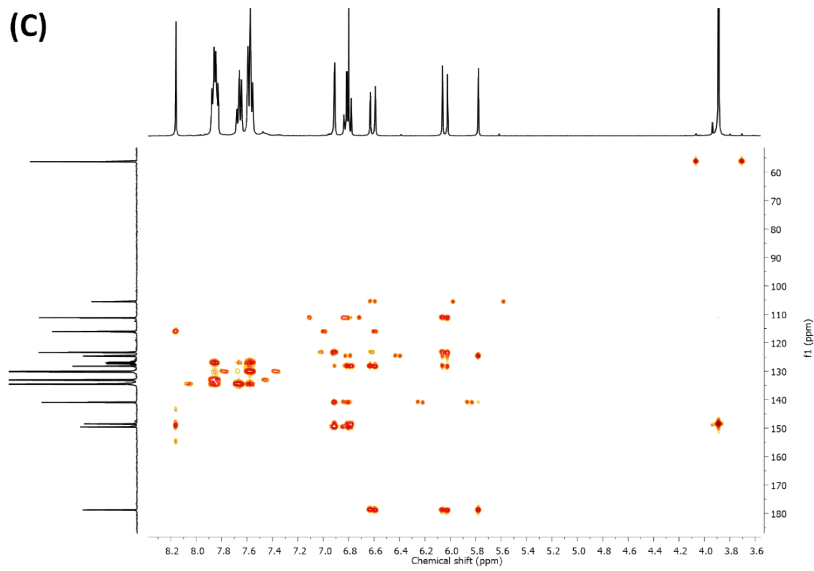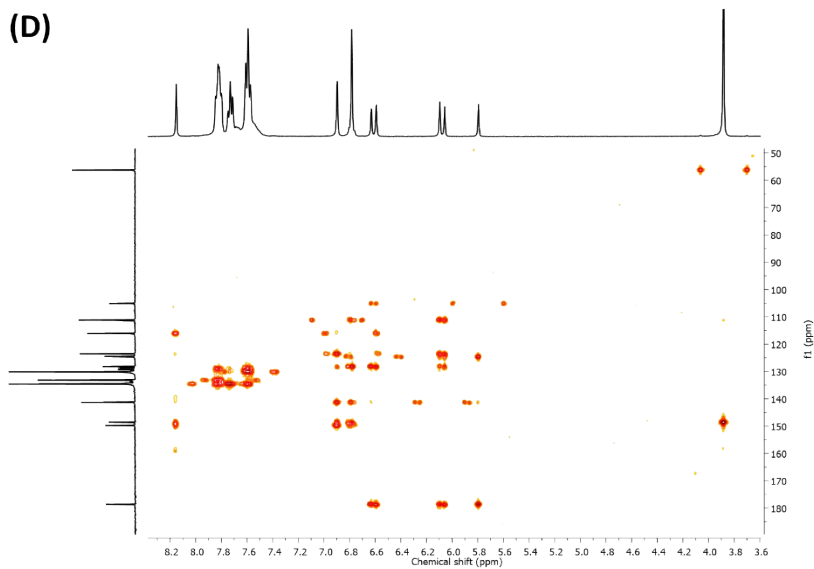

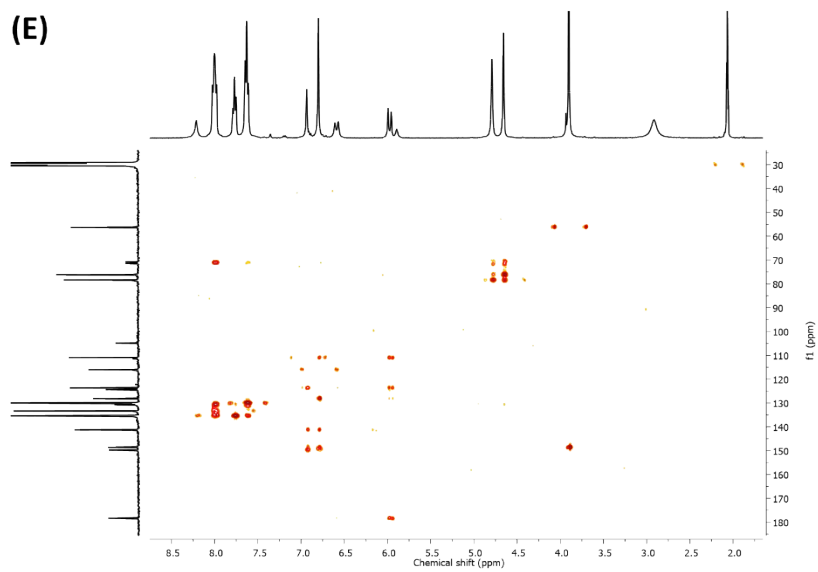

Figure S15.  $^1\text{H}$ - $^{13}\text{C}$  HMBC NMR of complexes (A) **A1**; (B) **A2**; (C) **A3**; (D) **A4** and (E) **A5**, in acetone- $\text{d}_6$ .

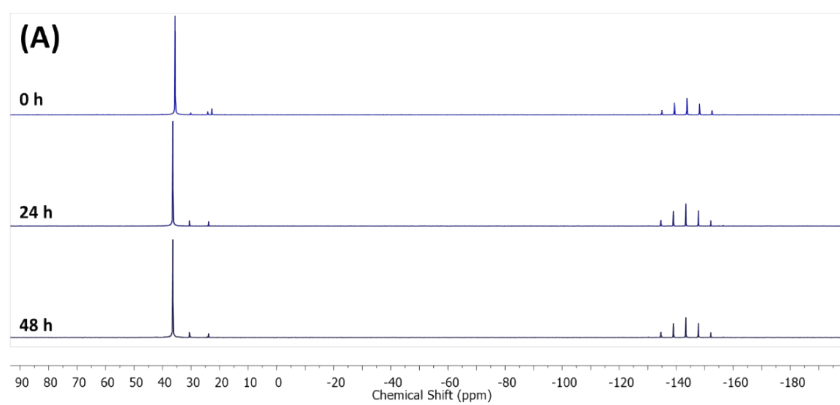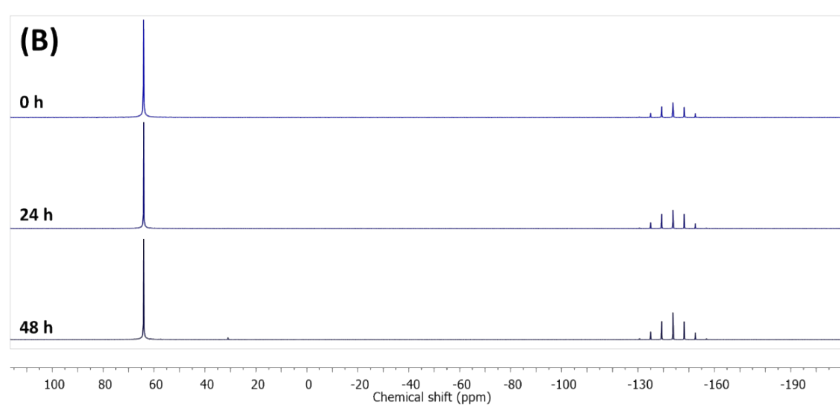

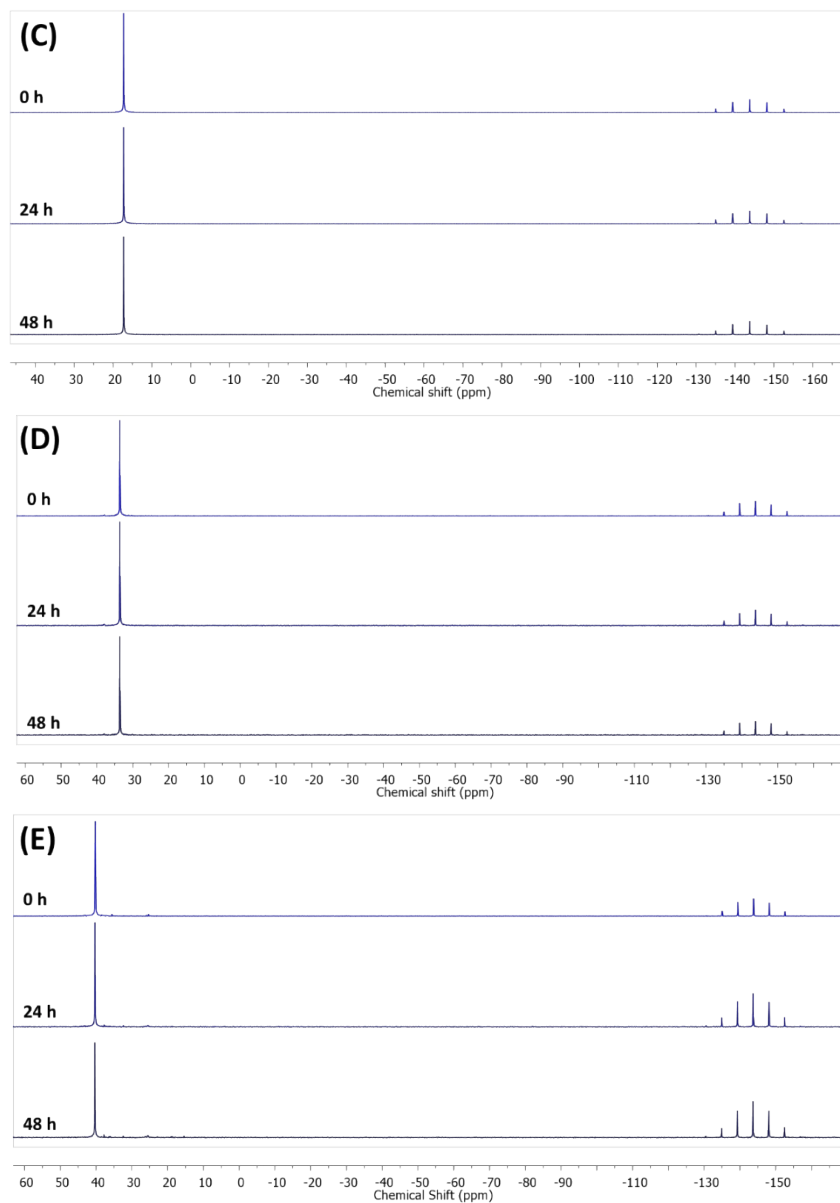

Figure S16.  $^{31}\text{P}\{^1\text{H}\}$  NMR spectra of the complexes (A) **A1**; (B) **A2**; (C) **A3**; (D) **A4** and (E) **A5**, in DMSO (with  $\text{D}_2\text{O}$  capillary), in 0, 24, and 48 h.

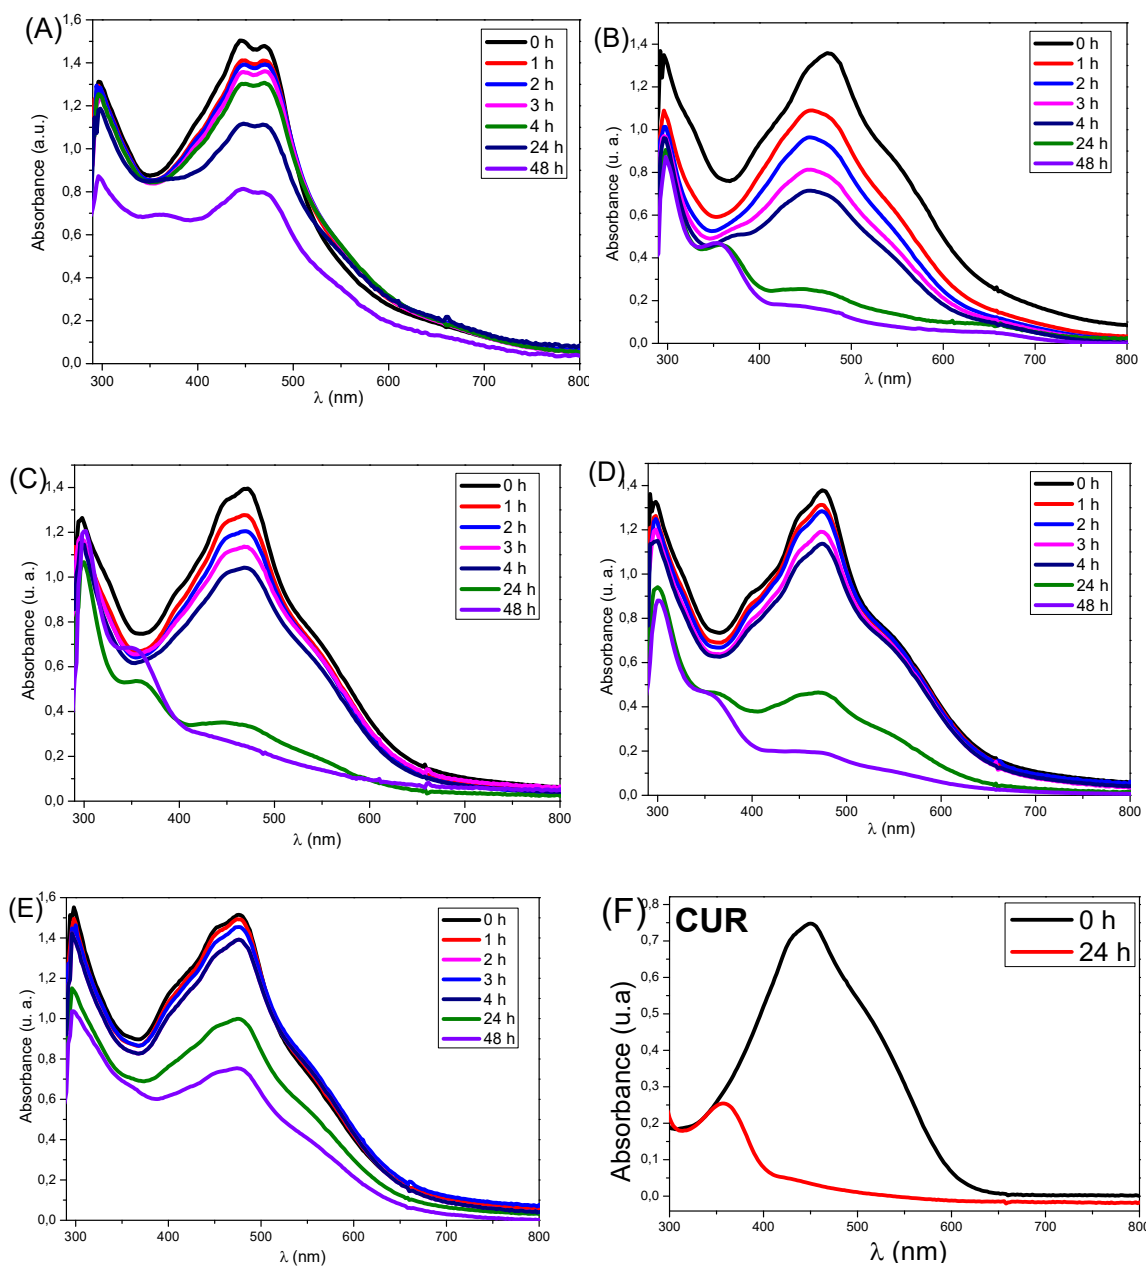

Figure S17. UV-vis spectra in /RPMI Culture medium (DMSO 0.5%) of the complexes (A) A1; (B) A2; (C) A3; (D) A4; (E) A5 (40  $\mu$ M) and (F) free curcumin (20  $\mu$ M) at different times.

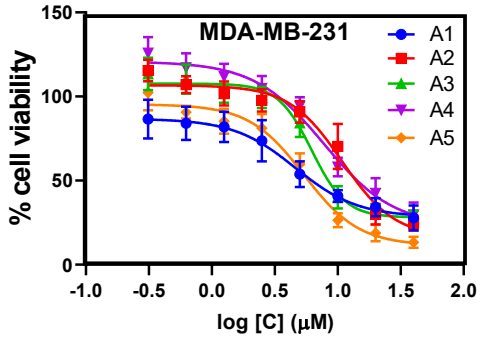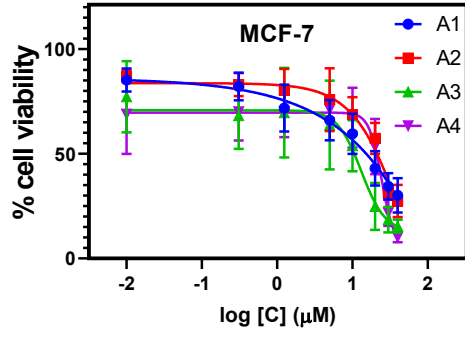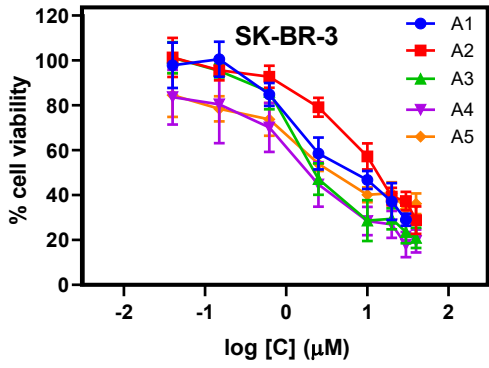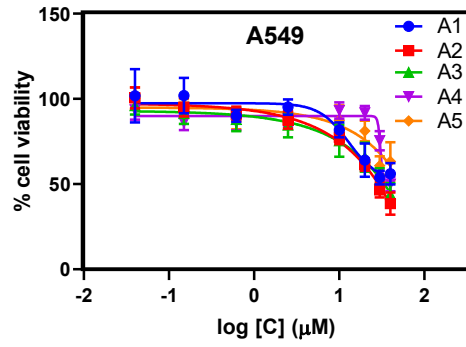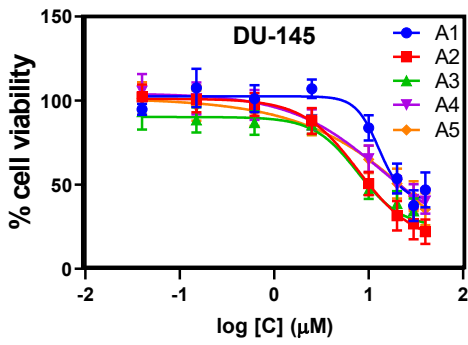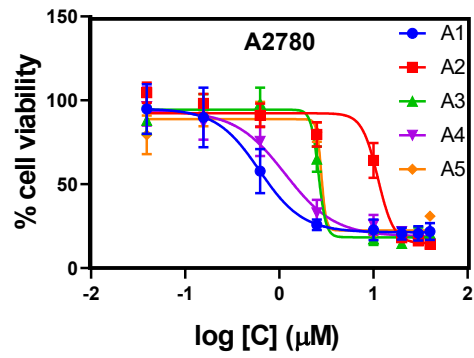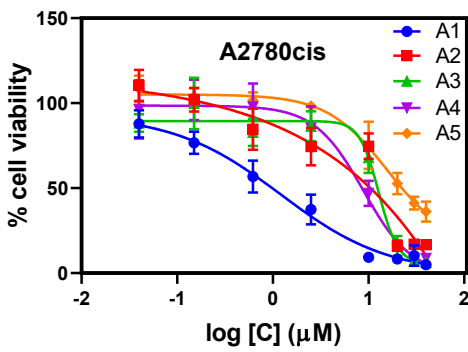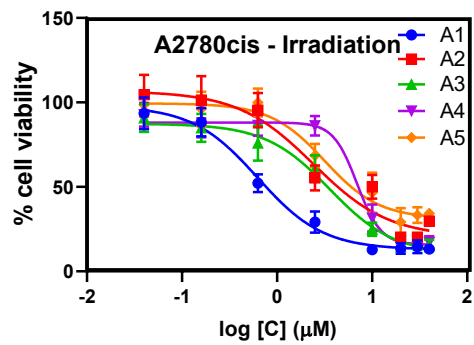

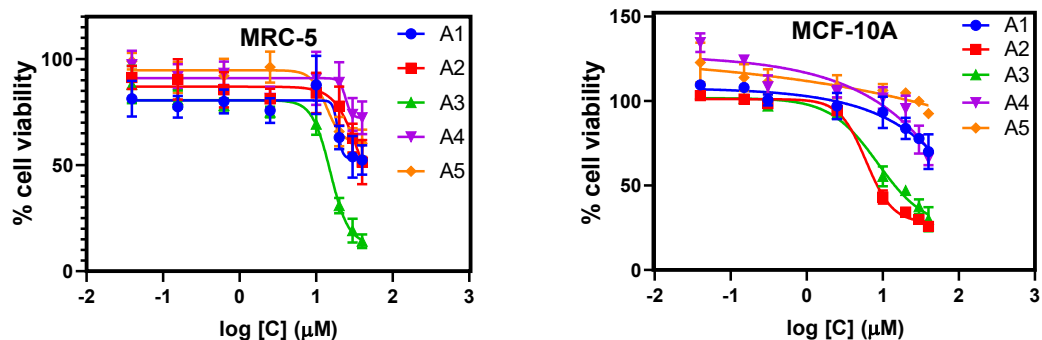

Figure S18. Cytotoxicity of complexes. Concentration-response curve of tumor cells (MDA-MB-231, MCF7, SKBR-3, A549, DU-145, A2780 and A2780cis ) and non-tumor cells (MCF-10A and MRC-5) after complexes treatment for 48 h.

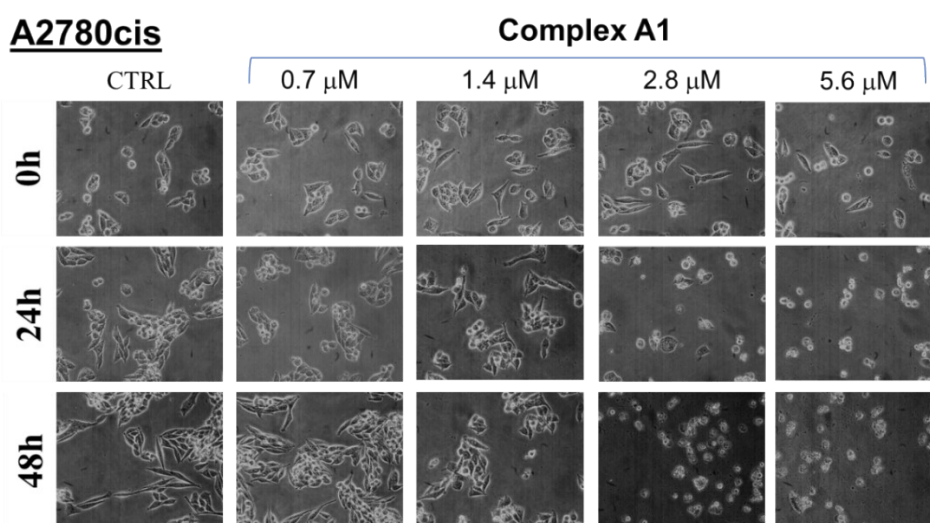

Figure S19. Effect of complex A1 on A2780cis cell morphology after incubation for 0, 24, and 48 h.

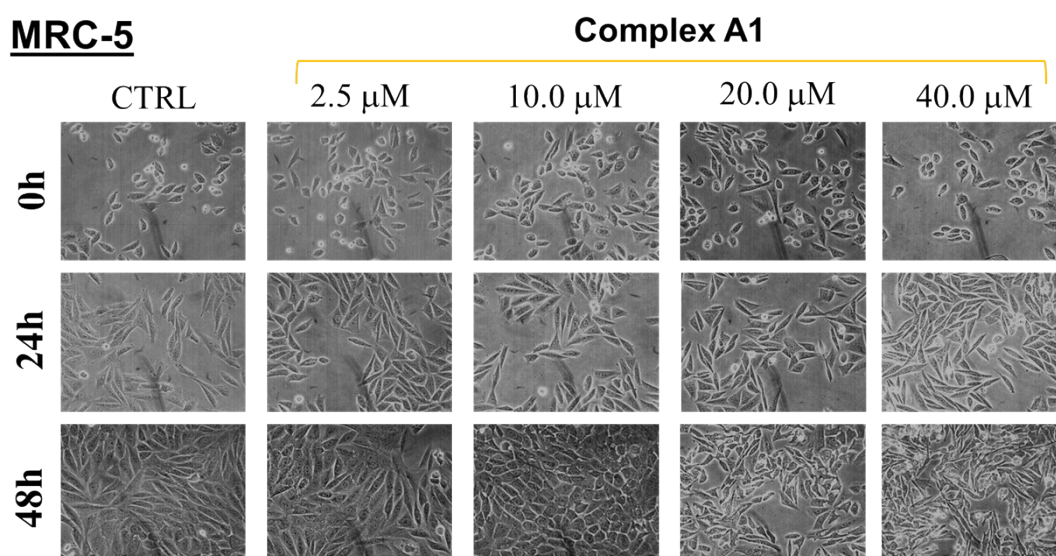

Figure S20. Effect of complex A1 on MRC-5 cell morphology after incubation for 0, 24, and 48 h.

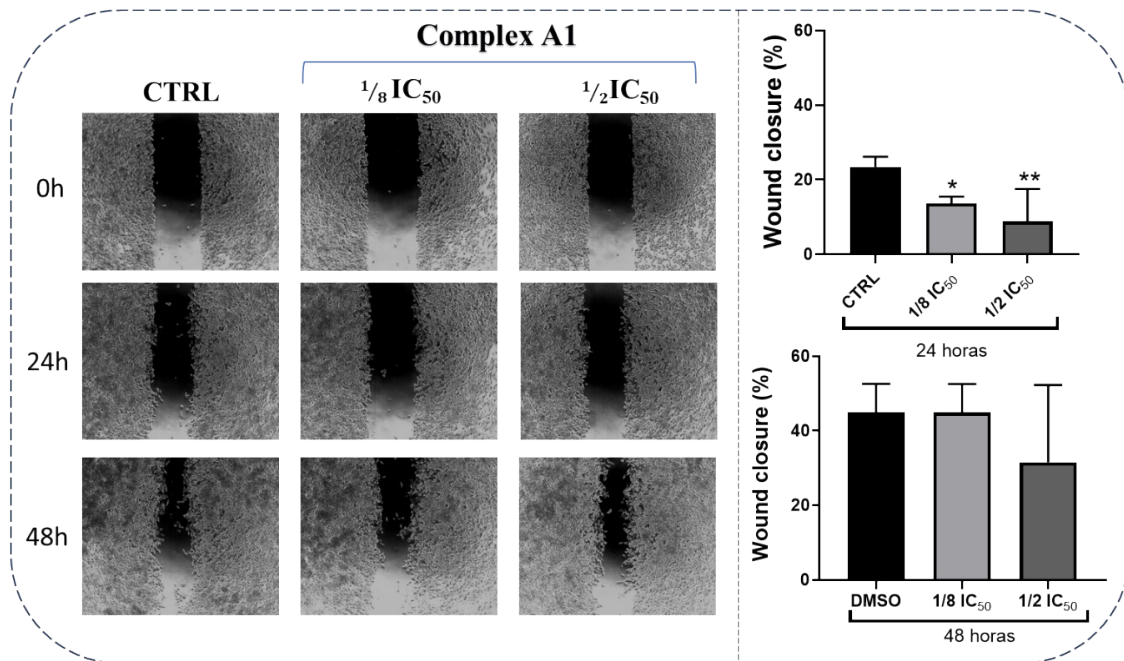

Figure S21. Effect of complex A1 on A2780cis cell migration by using an inverted microscope (4 $\times$ ) and graph of the wound-healing closure percentages for treatment with complex A1. These experiments were representative of three independent assays. Significance at (\*\*\*\*)  $p < 0.0001$  using ANOVA. Solvent control experiments were performed with DMSO (0.5%).

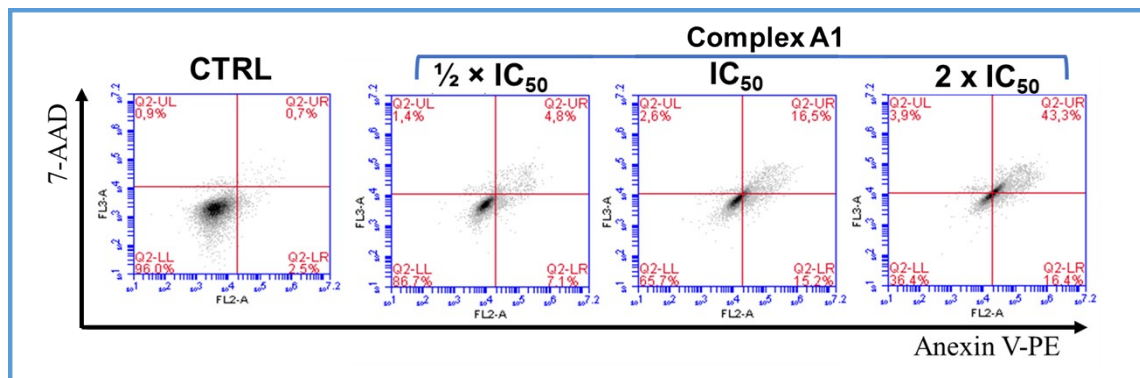

Figure S22. (A) Effects of complex A1 on apoptosis of A2780cis cells after 24 h of treatment at  $\frac{1}{2} \times IC_{50}$  (0.7  $\mu M$ ),  $IC_{50}$  (1.4  $\mu M$ ) and  $2 \times IC_{50}$  (2.8  $\mu M$ ) concentrations of complex A1. Apoptosis assay with PE-Annexin V (detected in the FL2-A channel) and 7AAD (detected in the FL3-A channel).



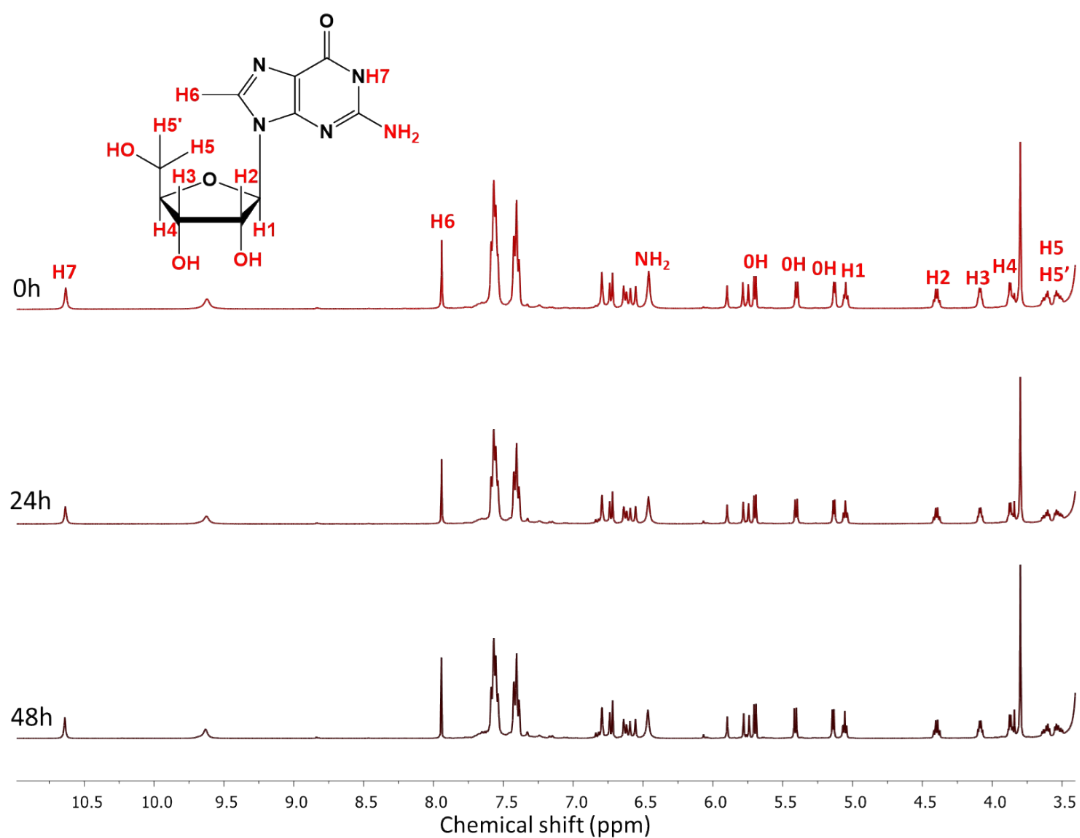

Figure S23.  $^1\text{H}$  NMR spectra of the A1 complex with guanosine (1 mol: 2 mol) at 0, 24 and 48 hours in deuterated DMSO.

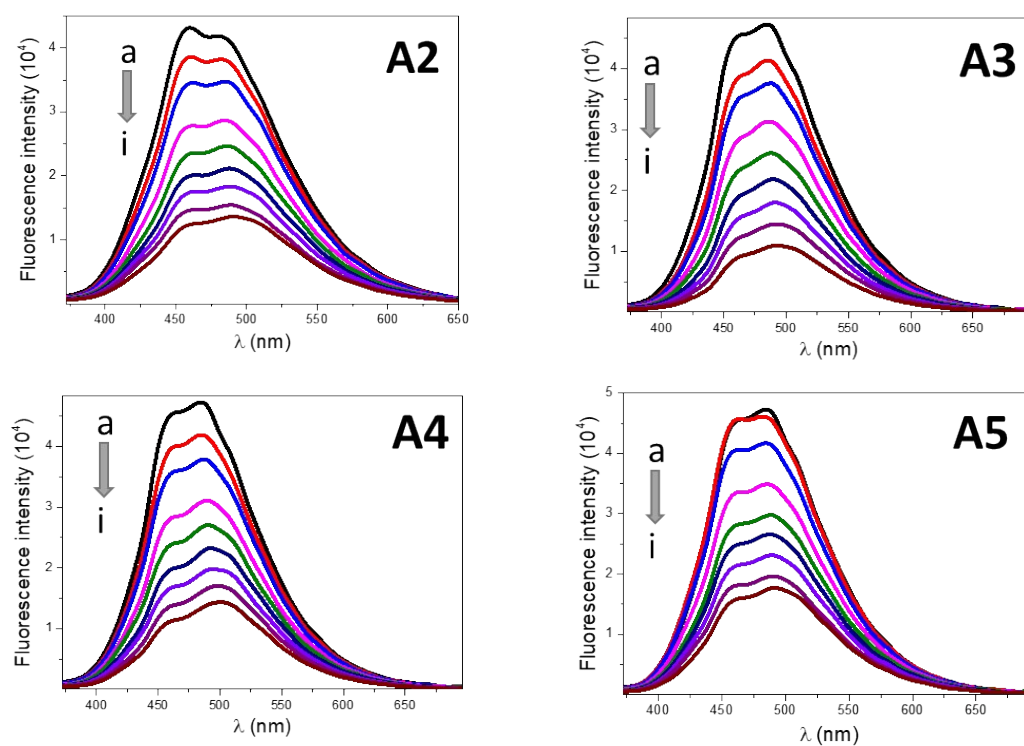

Figure S24. Emission spectra of Hoechst (2.5  $\mu\text{M}$ )/CT-DNA (75  $\mu\text{M}$ ) ( $I_{\text{ex}} = 343 \text{ nm}$ ) with different concentrations of complexes A2-A5 (a = 0; b = 2.5  $\mu\text{M}$ ; c = 5.0  $\mu\text{M}$ ; d = 7.5  $\mu\text{M}$ ; e = 10.0  $\mu\text{M}$ ; f = 12.5  $\mu\text{M}$ ; g = 15.0  $\mu\text{M}$ ; h = 17.5  $\mu\text{M}$ ; i = 20.0  $\mu\text{M}$ ).

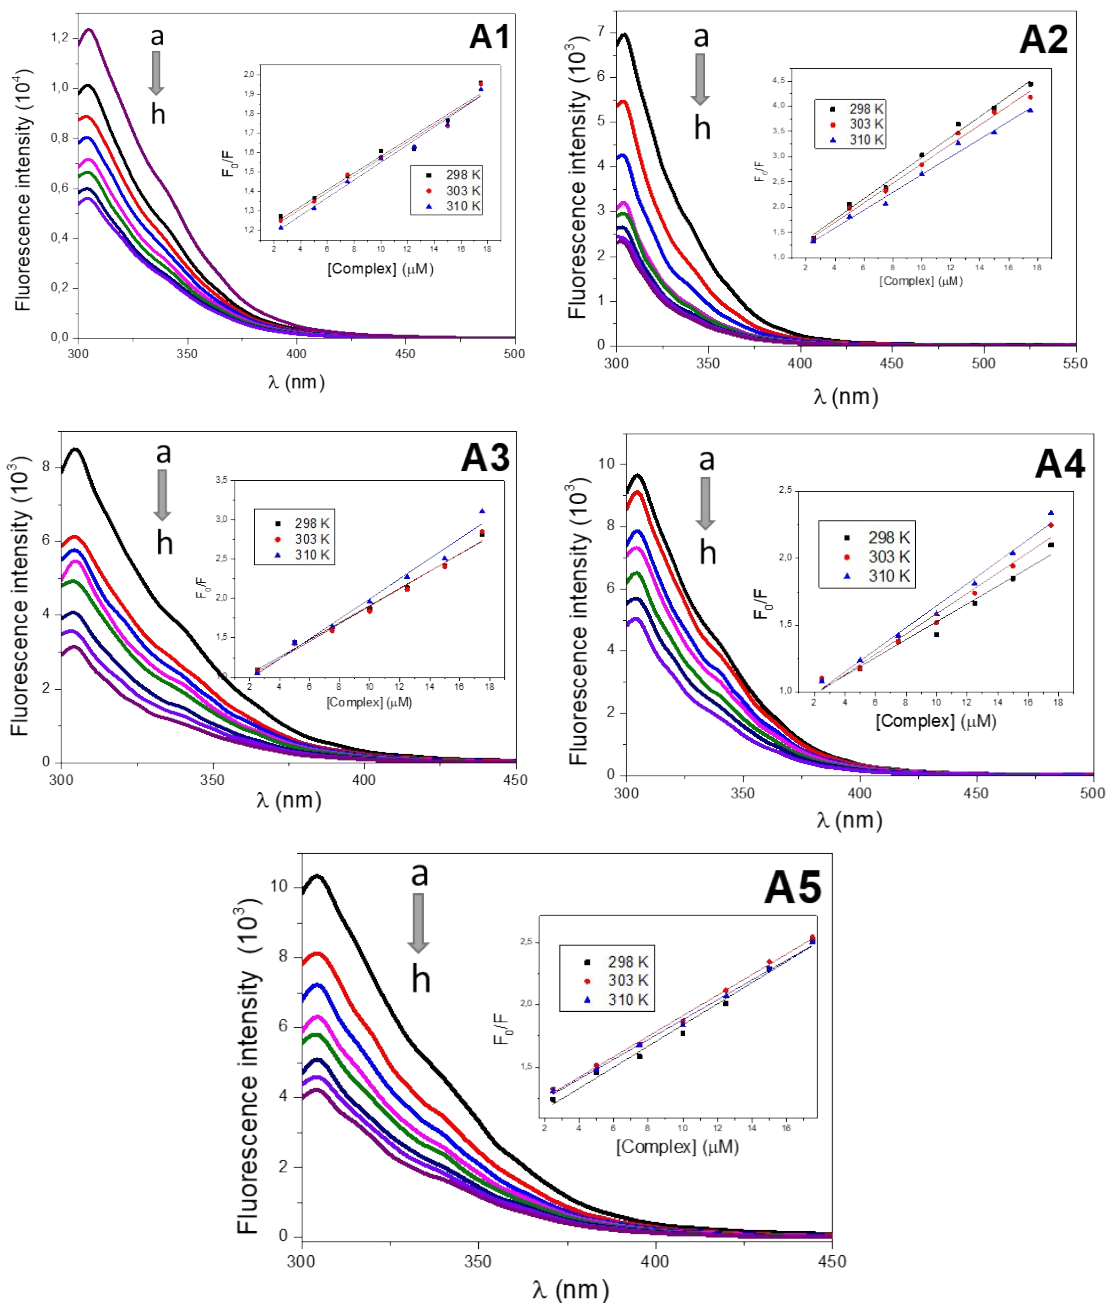

Figure S25. Fluorescence spectra of HSA solution (2.5  $\mu\text{M}$ ) in Tris-HCl buffer (0.1 M NaCl, pH 7.4) in the absence and presence of different concentrations of complexes A1-A5 (a = 0; b = 2.5  $\mu\text{M}$ ; c = 5.0  $\mu\text{M}$ ; d = 7.5  $\mu\text{M}$ ; e = 10.0  $\mu\text{M}$ ; f = 12.5  $\mu\text{M}$ ; g = 15.0  $\mu\text{M}$  and h = 17.5  $\mu\text{M}$ ). Inset: Stern-Volmer plots for the quenching of HSA fluorescence by complexes, 298, 303 and 310 K.

## Tables

Table S1. Selected Interatomic Distances and Bond Angles for complexes.

| Bond lengths (Å) | Cur*  | Complexes  |            |            |            |
|------------------|-------|------------|------------|------------|------------|
|                  |       | A1         | A2         | A4         | A5         |
| Pd(1)–P(1)       | –     | 2.2866(6)  | 2.2162(5)  | 2.2409(17) | 2.2596(10) |
| Pd(1)–P(2)       | –     | 2.2569(6)  | 2.2257(6)  | 2.2504(15) | 2.2816(10) |
| Pd(1)–O(1)       | –     | 2.0444(16) | 2.0509(14) | 2.063(4)   | 2.045(3)   |
| Pd(1)–O(3)       | –     | 2.0360(16) | 2.0486(14) | 2.051(4)   | 2.046(3)   |
| C(1)–O(1)        | 1.298 | 1.286(3)   | 1.290(3)   | 1.285(7)   | 1.280(5)   |
| C(3)–O(3)        | 1.303 | 1.285(3)   | 1.282(2)   | 1.271(7)   | 1.294(5)   |

  

| bond angles (deg) | Complexes |           |            |           |
|-------------------|-----------|-----------|------------|-----------|
|                   | A1        | A2        | A4         | A5        |
| O(1)–Pd(1)–P(1)   | 170.01(5) | 176.25(4) | 175.27(11) | 177.49(8) |
| O(3)–Pd(1)–P(2)   | 178.18(5) | 173.61(4) | 176.92(12) | 175.40(8) |
| P(2)–Pd(1)–P(1)   | 95.69(2)  | 86.01(2)  | 92.93(6)   | 95.95(4)  |
| O(1)–Pd(1)–P(2)   | 87.14(5)  | 91.07(4)  | 90.87(11)  | 83.64(8)  |
| O(3)–Pd(1)–P(1)   | 84.72(5)  | 89.30(4)  | 84.01(12)  | 88.63(8)  |
| O(3)–Pd(1)–O(1)   | 92.74(6)  | 93.79(6)  | 92.21(15)  | 91.79(11) |

\*CCDC

code

636155

Table S2. Crystal data and structure refinement parameters obtained for the complexes A1, A2, A4 and A5.

|                                    | A1                                                                              | A2                                                                              | A4                                                                              | A5                                                                                                |
|------------------------------------|---------------------------------------------------------------------------------|---------------------------------------------------------------------------------|---------------------------------------------------------------------------------|---------------------------------------------------------------------------------------------------|
| Empirical formula                  | C <sub>57</sub> H <sub>49</sub> F <sub>6</sub> O <sub>6</sub> P <sub>3</sub> Pd | C <sub>47</sub> H <sub>43</sub> F <sub>6</sub> O <sub>6</sub> P <sub>3</sub> Pd | C <sub>49</sub> H <sub>47</sub> F <sub>6</sub> O <sub>6</sub> P <sub>3</sub> Pd | C <sub>58</sub> H <sub>50</sub> Cl <sub>9</sub> F <sub>6</sub> FeO <sub>6</sub> P <sub>3</sub> Pd |
| Formula weight                     | 1143.27                                                                         | 1017.12                                                                         | 1045.17                                                                         | 1531.19                                                                                           |
| Temperature                        | 100 K                                                                           | 100 K                                                                           | 293(2)                                                                          | 100(1)                                                                                            |
| Crystal system                     | Monoclinic                                                                      | Monoclinic                                                                      | Triclinic                                                                       | Monoclinic                                                                                        |
| Space group                        | P2 <sub>1</sub> /c                                                              | P2 <sub>1</sub> /n                                                              | P-1                                                                             | P2 <sub>1</sub> /n                                                                                |
| Unit cell dimensions               | a = 14.0442(3) Å                                                                | a = 14.0940(2) Å                                                                | a = 9.0366(6) Å                                                                 | a = 17.9737(3) Å                                                                                  |
|                                    | b = 9.5822(2) Å                                                                 | b = 22.4280(3) Å                                                                | b = 16.4302(12) Å                                                               | b = 15.9310(3) Å                                                                                  |
|                                    | c = 37.0985(7) Å                                                                | c = 16.0300(3) Å                                                                | c = 19.0475(13) Å                                                               | c = 23.2031(5) Å                                                                                  |
|                                    | α = 90°                                                                         | α = 90°                                                                         | α = 112.064(7)°                                                                 | α = 90°                                                                                           |
|                                    | β = 94.609(2)°                                                                  | β = 112.924(2)°                                                                 | β = 96.129(6)°                                                                  | β = 95.1174(18)°                                                                                  |
|                                    | γ = 90°                                                                         | γ = 90°                                                                         | γ = 101.480(6)°                                                                 | γ = 90°                                                                                           |
| Volume/Å <sup>3</sup>              | 4976.36(18)                                                                     | 4666.90(14)                                                                     | 2516.7(3)                                                                       | 6617.5(2)                                                                                         |
| Z                                  | 4                                                                               | 4                                                                               | 2                                                                               | 4                                                                                                 |
| ρ <sub>calc</sub> /cm <sup>3</sup> | 1.526                                                                           | 1.448                                                                           | 1.379                                                                           | 1.537                                                                                             |
| μ/mm <sup>-1</sup>                 | 0.545                                                                           | 0.571                                                                           | 0.531                                                                           | 0.990                                                                                             |
| F(000)                             | 2336.0                                                                          | 2072.0                                                                          | 1068.0                                                                          | 3080.0                                                                                            |
| Crystal size                       | 0.188 × 0.062 × 0.027 mm <sup>3</sup>                                           | 0.177 × 0.139 × 0.105 mm <sup>3</sup>                                           | 0.208 × 0.102 × 0.063 mm <sup>3</sup>                                           | 0.319 × 0.282 × 0.175 mm <sup>3</sup>                                                             |
| 2θ range for data collection       | 3.506 to 51.496°                                                                | 3.742 to 51.5°                                                                  | 5.06 to 51.496°                                                                 | 4.354 to 51.36°                                                                                   |
| Index ranges                       | -16 ≤ h ≤ 17,                                                                   | -17 ≤ h ≤ 17,                                                                   | -11 ≤ h ≤ 11,                                                                   | -21 ≤ h ≤ 21,                                                                                     |
|                                    | -11 ≤ k ≤ 11,                                                                   | -27 ≤ k ≤ 27,                                                                   | -20 ≤ k ≤ 20,                                                                   | -18 ≤ k ≤ 19,                                                                                     |
|                                    | -45 ≤ l ≤ 45                                                                    | -19 ≤ l ≤ 19                                                                    | -23 ≤ l ≤ 23                                                                    | -28 ≤ l ≤ 28                                                                                      |
| Reflections collected              | 76902                                                                           | 94656                                                                           | 47990                                                                           | 57867                                                                                             |
| Independent reflections            | 9514                                                                            | 8938                                                                            | 9594                                                                            | 12522                                                                                             |
|                                    | [R <sub>int</sub> = 0.0650, R <sub>sigma</sub> = 0.0336]                        | [R <sub>int</sub> = 0.0472, R <sub>sigma</sub> = 0.0211]                        | [R <sub>int</sub> = 0.1055, R <sub>sigma</sub> = 0.0941]                        | [R <sub>int</sub> = 0.0429, R <sub>sigma</sub> = 0.0325]                                          |
| Data/restraints/parameters         | 9514/0/662                                                                      | 8938/0/572                                                                      | 9594/151/590                                                                    | 12522/84/797                                                                                      |
| Goodness-of-fit on F <sup>2</sup>  | 1.081                                                                           | 1.058                                                                           | 1.004                                                                           | 1.105                                                                                             |
| Final R indexes [I ≥ 2σ (I)]       | R <sub>1</sub> = 0.0339, wR <sub>2</sub> = 0.0765                               | R <sub>1</sub> = 0.0277, wR <sub>2</sub> = 0.0685                               | R <sub>1</sub> = 0.0800, wR <sub>2</sub> = 0.2250                               | R <sub>1</sub> = 0.0473, wR <sub>2</sub> = 0.1074                                                 |
| Final R indexes [all data]         | R <sub>1</sub> = 0.0395, wR <sub>2</sub> = 0.0789                               | R <sub>1</sub> = 0.0328, wR <sub>2</sub> = 0.0722                               | R <sub>1</sub> = 0.1093, wR <sub>2</sub> = 0.2609                               | R <sub>1</sub> = 0.0691, wR <sub>2</sub> = 0.1247                                                 |
| Largest diff. peak/hole            | 0.74/-0.62 e.Å <sup>-3</sup>                                                    | 0.65/-0.48 e.Å <sup>-3</sup>                                                    | 2.06/-1.41 e.Å <sup>-3</sup>                                                    | 1.11/-1.11 e.Å <sup>-3</sup>                                                                      |

Table S3. Assign the main IR bands of free curcumin and complexes.

|                   | Vibrational Frequency (cm <sup>-1</sup> ) |      |      |      |      |      |
|-------------------|-------------------------------------------|------|------|------|------|------|
|                   | Compounds                                 |      |      |      |      |      |
|                   | Cur                                       | A1   | A2   | A3   | A4   | A5   |
| v OH              | 3448                                      | 3503 | 3510 | 3458 | 3514 | 3491 |
| v (C=O) ketone    | 1628                                      | 1621 | 1624 | 1616 | 1622 | 1620 |
| v (C=C) aliphatic | 1514                                      | 1504 | 1504 | 1504 | 1506 | 1504 |
| v (C–O) phenol    | 1282                                      | 1282 | 1280 | 1290 | 1292 | 1288 |
| v P–C             | -                                         | 1095 | 1030 | 1085 | 1100 | 1095 |
| v P–F             | -                                         | 840  | 840  | 844  | 840  | 844  |

Table S4. In vitro cell viability results (IC<sub>50</sub> values) toward some cell lines studied.

| Compounds                                                         | IC <sub>50</sub> (μmol/L) 48 h |       |        |       |           |
|-------------------------------------------------------------------|--------------------------------|-------|--------|-------|-----------|
|                                                                   | MDA-MB-231                     | MCF-7 | SKBR-3 | A2780 | A2780cis  |
| <b>P1</b> - [PdCl <sub>2</sub> (PPh <sub>3</sub> ) <sub>2</sub> ] | ≥25                            | ≥25   | ≥25    | n.t   | ≥25       |
| <b>P2</b> - [PdCl <sub>2</sub> (dppe)]                            | ≥50                            | ≥50   | ≥50    | ≥50   | ≥50       |
| <b>P3</b> - [PdCl <sub>2</sub> (dppp)]                            | ≥50                            | ≥50   | ≥50    | n.t   | ≥50       |
| <b>P4</b> - [PdCl <sub>2</sub> (dppb)]                            | ≥25                            | ≥25   | ≥25    | n.t   | ≥25       |
| <b>P5</b> - [PdCl <sub>2</sub> (dppf)]                            | ≥50                            | ≥40   | ≥40    | n.t   | 9.9 ± 0.9 |

Table S5 - In vitro cell viability results (IC<sub>50</sub> values) toward some cell lines studied.

| Compounds                                                                           | IC <sub>50</sub> (μM) 48 h |            |            |
|-------------------------------------------------------------------------------------|----------------------------|------------|------------|
|                                                                                     | MCF-7                      | A549       | DU-145     |
| <b>A1</b> - [Pd(cur)(PPh <sub>3</sub> ) <sub>2</sub> ] <sub>2</sub> PF <sub>6</sub> | 24.8 ± 0.2                 | ≥40        | 12.6 ± 0.4 |
| <b>A2</b> - [Pd(cur)(dppe)]PF <sub>6</sub>                                          | 22.6 ± 0.3                 | ≥40        | 18.6 ± 0.4 |
| <b>A3</b> - [Pd(cur)(dppp)]PF <sub>6</sub>                                          | 12.0 ± 1.1                 | ≥40        | 18.5 ± 1.3 |
| <b>A4</b> - [Pd(cur)(dppb)]PF <sub>6</sub>                                          | 15.1 ± 0.4                 | ≥40        | 22.9 ± 0.6 |
| <b>A5</b> - [Pd(cur)(dppf)]PF <sub>6</sub>                                          | ≥40                        | ≥40        | ≥40        |
| Curcumin                                                                            | 36.8 ± 1.6                 | 38.9 ± 1.3 | n.t        |
| Cisplatin                                                                           | 13.9 ± 2.0                 | 14.4 ± 1.4 | 2.3 ± 0.4  |
